# Supplementary material for: Thermodynamic aspect of sulfur, polysulfide anion and lithium polysulfide: plausible reaction path during discharge of lithium–sulfur battery
Source: Royal Society of Chemistry journal article supplement (doi:10.1039/d0cp04898d), 2021-01-01
Supplement: d0cp04898d1.pdf [file d0cp04898d1.pdf]

## Electronic supplementary information (ESI)

### Thermodynamic aspect of sulfur, polysulfide anion and lithium polysulfide: Plausible reaction path during discharge of lithium-sulfur battery

Seiji Tsuzuki,<sup>a\*</sup> Tomoaki Kaneko,<sup>b</sup> Keitaro Sodeyama,<sup>b</sup> Yasuhiro Umebayashi,<sup>c</sup> Wataru Shinoda,<sup>d</sup> Shiro Seki,<sup>e</sup> Kazuhide Ueno,<sup>f</sup> Kaoru Dokko,<sup>fg</sup> Masayoshi Watanabe<sup>f</sup>

<sup>a</sup> Research Center for Computational Design of Advanced Functional Materials (CD-FMat), National Institute of Advanced Industrial Science and Technology (AIST), 1-1-1 Umezono, Tsukuba, Ibaraki 305-8568, Japan. E-mail: [s.tsuzuki@aist.go.jp](mailto:s.tsuzuki@aist.go.jp)

<sup>b</sup> Research and Services Division of Materials Data and Integrated System, National Institute for Materials Science (NIMS), 1-1 Namiki, Tsukuba, Ibaraki 305-0044, Japan.

<sup>c</sup> Graduate School of Science and Technology Niigata University 8050, Ikarashi, 2-no-cho, Nishi-ku, Niigata 950-2181, Japan

<sup>d</sup> Department of Materials Chemistry, Nagoya University, Furo-cho, Chikusa-ku, Nagoya 464-8603, Japan

<sup>e</sup> Department of Environmental Chemistry and Chemical Engineering, School of Advanced Engineering, Kogakuin University, 2665-1 Nakano-machi, Hachioji, Tokyo 192-0015, Japan

<sup>f</sup> Department of Chemistry and Biotechnology, Yokohama National University, 79-5 Tokiwadai, Hodogaya-ku, Yokohama 240-8501, Japan

<sup>g</sup> Unit of Elements Strategy Initiative for Catalysts & Batteries (ESICB), Kyoto University, Kyoto 615-8510, Japan

Heats of redox reactions in solid phase, Number of initial geometries used for geometry optimizations of  $S_n$ ,  $S_n^{\cdot-}$ ,  $S_n^{2-}$  and  $Li_2S_n$ , Energies of  $S_n$ ,  $S_n^{\cdot-}$  and  $S_n^{2-}$  relative to  $S_8$  per one sulfur atom, Heats of reduction and oxidation reactions of  $S_8$  and  $Li_2S_n$ , Optimized geometries of  $S_n$ ,  $S_n^{\cdot-}$ ,  $S_n^{2-}$ ,  $[LiS_n]^-$  and  $Li_2S_n$ , Basis set and electron correlation effects on relative energies of  $S_8$  isomers, Molecular orbitals of  $S_4$ ,  $S_4^{\cdot-}$  and  $S_4^{2-}$ .

## Heats of redox reactions in solid phase

Heats of redox reactions in solid phase ( $\Delta E_{\text{solid}}$ ) were calculated from those in the gas phase ( $\Delta E_{\text{gas}}$ ) and heats of sublimation of reactants and products ( $\Delta E_{\text{sub(reactant)}}$  and  $\Delta E_{\text{sub(product)}}$ ) according to the equation,

$$\Delta E_{\text{solid}} = \Delta E_{\text{gas}} + (\Delta E_{\text{sub(product)}} - \Delta E_{\text{sub(reactant)}}).$$

The heats of sublimation ( $\Delta E_{\text{sub}}$ ) of  $\text{S}_8$ , Li and  $\text{Li}_2\text{S}_n$  summarized in Table 2 were used for the calculations. The  $\Delta E_{\text{sub}}$  of  $\text{Li}_2\text{S}_n$  ( $n = 2-8$ ) were assumed to be identical to the  $\Delta E_{\text{sub}}$  of  $\text{Li}_2\text{S}$ , since we were unable to calculate the  $\Delta E_{\text{sub}}$  of other  $\text{Li}_2\text{S}_n$  ( $n = 2-8$ ) owing to the lack of crystal structures.

In this study, quantum espresso code was employed to calculate the solid phase of Li,  $\text{Li}_2\text{S}$ , and  $\text{S}_8$  within B86R exchange functional with the nonlocal correlation functional of vdW-DF2 and ultra-soft pseudo-potentials [1,2]. We assumed that Li,  $\text{Li}_2\text{S}$ , and  $\text{S}_8$  were bcc, anti-fluorite, and  $\alpha$ -S phase. The structure  $\alpha$ -S belongs to a space group  $Fddd$  (No. 70) [3].

For the total energy calculations, the cutoff energies of plane wave basis set and charge density were 30 Ry and 270 Ry, respectively. The cell parameters of  $\alpha$ -S were optimized by stress tensor with the cutoff energies of plane wave basis set and charge density of 50 Ry and 450 Ry, respectively. The k-samplings of  $12 \times 12 \times 12$ ,  $12 \times 12 \times 12$ , and  $2 \times 2 \times 1$  were adopted for bcc-Li,  $\text{Li}_2\text{S}$ , and  $\alpha$ -S, respectively. Only the  $\Gamma$ -point is sampled for molecules. The optimized lattice constants of bcc-Li, and  $\text{Li}_2\text{S}$ , were 3.435, and 5.967 Angstrom, respectively. Obtained lattice constants of  $\alpha$ -S were  $a=10.363$  A,  $b=12.741$  A,  $c=24.496$  A. These lattice parameters are close to the corresponding experimental values. The molecules were isolated in the unit cell with volume of  $15 \times 15 \times 15$  A<sup>3</sup>.

## References

- [1] D. Vanderbilt, Phys. Rev. B 41, 7892 (1990).
- [2] K. F. Garrity, J. W. Bennett, K. M. Rabe, and D. Vanderbilt, Computational Materials Science 81, 446 (2014).
- [3] S. J. Rettig, and J. Trotter, Acta Cryst. C43, 2260-2262 (1987).

TABLE 1S. Number of initial geometries used for geometry optimizations of  $S_n$ ,  $S_n^{\cdot-}$ ,  $S_n^{2-}$ ,  $[LiS_n]^-$  and  $Li_2S_n$

| n | $S_n$ | $S_n^{\cdot-}$ | $S_n^{2-}$ | $[LiS_n]^-$ | $Li_2S_n$ |
|---|-------|----------------|------------|-------------|-----------|
| 1 | –     | –              | –          | 1           | 1         |
| 2 | 1     | 1              | 1          | 3           | 5         |
| 3 | 2     | 2              | 2          | 7           | 4         |
| 4 | 8     | 8              | 8          | 12          | 21        |
| 5 | 7     | 6              | 5          | 12          | 21        |
| 6 | 16    | 15             | 15         | 47          | 30        |
| 7 | 42    | 42             | 42         | 15          | 30        |
| 8 | 122   | 122            | 122        | 49          | 48        |

TABLE 2S. Energies of  $S_n$ ,  $S_n^{\cdot-}$  and  $S_n^{2-}$  relative to  $S_8$  per one sulfur atom<sup>a</sup>

| n |           | $S_n$       |            | $S_n^{\cdot-}$ |            | $S_n^{2-}$   |
|---|-----------|-------------|------------|----------------|------------|--------------|
| 1 | <b>1</b>  | 88.1 (3.82) | <b>9</b>   | 22.5 (0.98)    | <b>17</b>  | 166.5 (7.22) |
| 2 | <b>2</b>  | 19.3 (0.84) | <b>10</b>  | -4.3 (-0.19)   | <b>18</b>  | 51.4 (2.23)  |
| 3 | <b>3a</b> | 8.5 (0.37)  | <b>11a</b> | -7.8 (-0.34)   | <b>19a</b> | 20.9 (0.91)  |
| 4 | <b>4a</b> | 6.3 (0.27)  | <b>12a</b> | -5.6 (-0.24)   | <b>20a</b> | 9.1 (0.39)   |
| 5 | <b>5a</b> | 3.2 (0.14)  | <b>13a</b> | -4.0 (-0.17)   | <b>21a</b> | 3.4 (0.15)   |
| 6 | <b>6a</b> | 1.0 (0.04)  | <b>14a</b> | -3.4 (-0.15)   | <b>22a</b> | 0.4 (0.02)   |
| 7 | <b>7a</b> | 0.8 (0.04)  | <b>15a</b> | -3.8 (-0.16)   | <b>23a</b> | -1.3 (-0.06) |
| 8 | <b>8a</b> | 0.0 (0.0)   | <b>16a</b> | -3.7 (-0.16)   | <b>24a</b> | -2.2 (-0.10) |

<sup>a</sup> Relative energies for the most stable isomers calculated at the CCSD(T)/cc-pVTZ//MP3/cc-pVDZ level. Energies are in kcal/mol. Energies in eV are shown in parentheses.

TABLE 3S. Heats of reduction reactions of S<sub>8</sub>

|                                                                                                                               | $\Delta E_{\text{gas}}$ |       | $\Delta E_{\text{solid}}$ |       |
|-------------------------------------------------------------------------------------------------------------------------------|-------------------------|-------|---------------------------|-------|
|                                                                                                                               | kcal/mol                | eV    | kcal/mol                  | eV    |
| Li + 1/2 S <sub>8</sub> → 1/2 Li <sub>2</sub> S <sub>8</sub>                                                                  | -74.54                  | -3.23 | -75.59                    | -3.28 |
| Li + 1/4 S <sub>8</sub> → 1/4 Li <sub>2</sub> S + 1/4 Li <sub>2</sub> S <sub>7</sub>                                          | -58.03                  | -2.52 | -64.97                    | -2.82 |
| Li + 1/4 S <sub>8</sub> → 1/4 Li <sub>2</sub> S <sub>2</sub> + 1/4 Li <sub>2</sub> S <sub>6</sub>                             | -64.62                  | -2.80 | -71.56                    | -3.10 |
| Li + 1/4 S <sub>8</sub> → 1/4 Li <sub>2</sub> S <sub>3</sub> + 1/4 Li <sub>2</sub> S <sub>5</sub>                             | -67.80                  | -2.94 | -74.74                    | -3.24 |
| Li + 1/4 S <sub>8</sub> → 1/2 Li <sub>2</sub> S <sub>4</sub>                                                                  | -69.74                  | -3.02 | -76.67                    | -3.33 |
| Li + 1/6 S <sub>8</sub> → 1/3 Li <sub>2</sub> S + 1/6 Li <sub>2</sub> S <sub>6</sub>                                          | -52.75                  | -2.29 | -61.66                    | -2.67 |
| Li + 1/6 S <sub>8</sub> → 1/6 Li <sub>2</sub> S + 1/6 Li <sub>2</sub> S <sub>2</sub> + 1/6 Li <sub>2</sub> S <sub>5</sub>     | -56.59                  | -2.45 | -65.49                    | -2.84 |
| Li + 1/6 S <sub>8</sub> → 1/6 Li <sub>2</sub> S + 1/6 Li <sub>2</sub> S <sub>3</sub> + 1/6 Li <sub>2</sub> S <sub>4</sub>     | -58.66                  | -2.54 | -67.57                    | -2.93 |
| Li + 1/6 S <sub>8</sub> → 1/3 Li <sub>2</sub> S <sub>2</sub> + 1/6 Li <sub>2</sub> S <sub>4</sub>                             | -60.38                  | -2.62 | -69.28                    | -3.00 |
| Li + 1/6 S <sub>8</sub> → 1/6 Li <sub>2</sub> S <sub>2</sub> + 1/3 Li <sub>2</sub> S <sub>3</sub>                             | -61.16                  | -2.65 | -70.06                    | -3.04 |
| Li + 1/8 S <sub>8</sub> → 3/8 Li <sub>2</sub> S + 1/8 Li <sub>2</sub> S <sub>5</sub>                                          | -49.70                  | -2.16 | -59.59                    | -2.58 |
| Li + 1/8 S <sub>8</sub> → 1/4 Li <sub>2</sub> S + 1/8 Li <sub>2</sub> S <sub>2</sub> + 1/8 Li <sub>2</sub> S <sub>4</sub>     | -52.54                  | -2.28 | -62.43                    | -2.71 |
| Li + 1/8 S <sub>8</sub> → 1/4 Li <sub>2</sub> S + 1/4 Li <sub>2</sub> S <sub>3</sub>                                          | -53.13                  | -2.30 | -63.01                    | -2.73 |
| Li + 1/8 S <sub>8</sub> → 1/8 Li <sub>2</sub> S + 1/4 Li <sub>2</sub> S <sub>2</sub> + 1/8 Li <sub>2</sub> S <sub>3</sub>     | -54.41                  | -2.36 | -64.30                    | -2.79 |
| Li + 1/8 S <sub>8</sub> → 1/2 Li <sub>2</sub> S <sub>2</sub>                                                                  | -55.70                  | -2.42 | -65.58                    | -2.84 |
| Li + 1/10 S <sub>8</sub> → 2/5 Li <sub>2</sub> S + 1/10 Li <sub>2</sub> S <sub>4</sub>                                        | -47.84                  | -2.07 | -58.31                    | -2.53 |
| Li + 1/10 S <sub>8</sub> → 3/10 Li <sub>2</sub> S + 1/10 Li <sub>2</sub> S <sub>2</sub> + 1/10 Li <sub>2</sub> S <sub>3</sub> | -49.33                  | -2.14 | -59.81                    | -2.59 |
| Li + 1/10 S <sub>8</sub> → 1/5 Li <sub>2</sub> S + 3/10 Li <sub>2</sub> S <sub>2</sub>                                        | -50.36                  | -2.18 | -60.84                    | -2.64 |
| Li + 1/12 S <sub>8</sub> → 5/12 Li <sub>2</sub> S + 1/12 Li <sub>2</sub> S <sub>3</sub>                                       | -45.95                  | -1.99 | -56.82                    | -2.46 |
| Li + 1/12 S <sub>8</sub> → 1/3 Li <sub>2</sub> S + 1/6 Li <sub>2</sub> S <sub>2</sub>                                         | -46.81                  | -2.03 | -57.68                    | -2.50 |
| Li + 1/14 S <sub>8</sub> → 3/7 Li <sub>2</sub> S + 1/14 Li <sub>2</sub> S <sub>2</sub>                                        | -44.27                  | -1.92 | -55.42                    | -2.40 |
| Li + 1/16 S <sub>8</sub> → 1/2 Li <sub>2</sub> S                                                                              | -42.36                  | -1.84 | -53.72                    | -2.33 |

|             |
|-------------|
| -1.8 <      |
| -1.8 ~ -2.0 |
| -2.0 ~ -2.2 |
| -2.2 ~ -2.4 |
| -2.4 ~ -2.6 |
| -2.6 ~ -2.8 |
| -2.8 ~ -3.0 |
| -3.0 ~ -3.2 |
| < -3.2      |

22 reactions

TABLE 4S. Heats of reduction reactions of  $\text{Li}_2\text{S}_8$ 

|                                                                                                                                     | $\Delta E_{\text{gas}}$ |       | $\Delta E_{\text{solid}}$ |       |
|-------------------------------------------------------------------------------------------------------------------------------------|-------------------------|-------|---------------------------|-------|
|                                                                                                                                     | kcal/mol                | eV    | kcal/mol                  | eV    |
| $\text{Li} + 1/2 \text{Li}_2\text{S}_8 \rightarrow 1/2 \text{Li}_2\text{S} + 1/2 \text{Li}_2\text{S}_7$                             | -41.51                  | -1.80 | -54.34                    | -2.36 |
| $\text{Li} + 1/2 \text{Li}_2\text{S}_8 \rightarrow 1/2 \text{Li}_2\text{S}_2 + 1/2 \text{Li}_2\text{S}_6$                           | -54.69                  | -2.37 | -67.53                    | -2.93 |
| $\text{Li} + 1/2 \text{Li}_2\text{S}_8 \rightarrow 1/2 \text{Li}_2\text{S}_3 + 1/2 \text{Li}_2\text{S}_5$                           | -61.06                  | -2.65 | -73.90                    | -3.20 |
| $\text{Li} + 1/2 \text{Li}_2\text{S}_8 \rightarrow \text{Li}_2\text{S}_4$                                                           | -64.93                  | -2.82 | -77.76                    | -3.37 |
| $\text{Li} + 1/4 \text{Li}_2\text{S}_8 \rightarrow 1/2 \text{Li}_2\text{S} + 1/4 \text{Li}_2\text{S}_6$                             | -41.86                  | -1.82 | -54.69                    | -2.37 |
| $\text{Li} + 1/4 \text{Li}_2\text{S}_8 \rightarrow 1/4 \text{Li}_2\text{S} + 1/4 \text{Li}_2\text{S}_2 + 1/4 \text{Li}_2\text{S}_5$ | -47.61                  | -2.06 | -60.45                    | -2.62 |
| $\text{Li} + 1/4 \text{Li}_2\text{S}_8 \rightarrow 1/4 \text{Li}_2\text{S} + 1/4 \text{Li}_2\text{S}_3 + 1/4 \text{Li}_2\text{S}_4$ | -50.72                  | -2.20 | -63.56                    | -2.76 |
| $\text{Li} + 1/4 \text{Li}_2\text{S}_8 \rightarrow 1/2 \text{Li}_2\text{S}_2 + 1/4 \text{Li}_2\text{S}_4$                           | -53.29                  | -2.31 | -66.13                    | -2.87 |
| $\text{Li} + 1/4 \text{Li}_2\text{S}_8 \rightarrow 1/4 \text{Li}_2\text{S}_2 + 1/2 \text{Li}_2\text{S}_3$                           | -54.47                  | -2.36 | -67.30                    | -2.92 |
| $\text{Li} + 1/6 \text{Li}_2\text{S}_8 \rightarrow 1/2 \text{Li}_2\text{S} + 1/6 \text{Li}_2\text{S}_5$                             | -41.42                  | -1.80 | -54.25                    | -2.35 |
| $\text{Li} + 1/6 \text{Li}_2\text{S}_8 \rightarrow 1/3 \text{Li}_2\text{S} + 1/6 \text{Li}_2\text{S}_2 + 1/6 \text{Li}_2\text{S}_4$ | -45.20                  | -1.96 | -58.04                    | -2.52 |
| $\text{Li} + 1/6 \text{Li}_2\text{S}_8 \rightarrow 1/3 \text{Li}_2\text{S} + 1/3 \text{Li}_2\text{S}_3$                             | -45.99                  | -1.99 | -58.82                    | -2.55 |
| $\text{Li} + 1/6 \text{Li}_2\text{S}_8 \rightarrow 1/6 \text{Li}_2\text{S} + 1/3 \text{Li}_2\text{S}_2 + 1/6 \text{Li}_2\text{S}_3$ | -47.70                  | -2.07 | -60.53                    | -2.63 |
| $\text{Li} + 1/6 \text{Li}_2\text{S}_8 \rightarrow 2/3 \text{Li}_2\text{S}_2$                                                       | -49.41                  | -2.14 | -62.25                    | -2.70 |
| $\text{Li} + 1/8 \text{Li}_2\text{S}_8 \rightarrow 1/2 \text{Li}_2\text{S} + 1/8 \text{Li}_2\text{S}_4$                             | -41.16                  | -1.78 | -53.99                    | -2.34 |
| $\text{Li} + 1/8 \text{Li}_2\text{S}_8 \rightarrow 3/8 \text{Li}_2\text{S} + 1/8 \text{Li}_2\text{S}_2 + 1/8 \text{Li}_2\text{S}_3$ | -43.03                  | -1.87 | -55.87                    | -2.42 |
| $\text{Li} + 1/8 \text{Li}_2\text{S}_8 \rightarrow 1/4 \text{Li}_2\text{S} + 3/8 \text{Li}_2\text{S}_2$                             | -44.32                  | -1.92 | -57.15                    | -2.48 |
| $\text{Li} + 1/10 \text{Li}_2\text{S}_8 \rightarrow 1/2 \text{Li}_2\text{S} + 1/10 \text{Li}_2\text{S}_3$                           | -40.23                  | -1.74 | -53.06                    | -2.30 |
| $\text{Li} + 1/10 \text{Li}_2\text{S}_8 \rightarrow 2/5 \text{Li}_2\text{S} + 1/5 \text{Li}_2\text{S}_2$                            | -41.26                  | -1.79 | -54.09                    | -2.35 |
| $\text{Li} + 1/12 \text{Li}_2\text{S}_8 \rightarrow 1/2 \text{Li}_2\text{S} + 1/12 \text{Li}_2\text{S}_2$                           | -39.22                  | -1.70 | -52.05                    | -2.26 |
| $\text{Li} + 1/14 \text{Li}_2\text{S}_8 \rightarrow 4/7 \text{Li}_2\text{S}$                                                        | -37.76                  | -1.64 | -50.60                    | -2.19 |

21 reactions

TABLE 5S. Heats of reduction reactions of  $\text{Li}_2\text{S}_7$ 

|                                                                                                                                        | $\Delta E_{\text{gas}}$ |       | $\Delta E_{\text{solid}}$ |       |
|----------------------------------------------------------------------------------------------------------------------------------------|-------------------------|-------|---------------------------|-------|
|                                                                                                                                        | kcal/mol                | eV    | kcal/mol                  | eV    |
| $\text{Li} + 1/2 \text{Li}_2\text{S}_7 \rightarrow 1/2 \text{Li}_2\text{S} + 1/2 \text{Li}_2\text{S}_6$                                | -42.21                  | -1.83 | -55.04                    | -2.39 |
| $\text{Li} + 1/2 \text{Li}_2\text{S}_7 \rightarrow 1/2 \text{Li}_2\text{S}_2 + 1/2 \text{Li}_2\text{S}_5$                              | -53.72                  | -2.33 | -66.55                    | -2.89 |
| $\text{Li} + 1/2 \text{Li}_2\text{S}_7 \rightarrow 1/2 \text{Li}_2\text{S}_3 + 1/2 \text{Li}_2\text{S}_4$                              | -59.94                  | -2.60 | -72.77                    | -3.16 |
| $\text{Li} + 1/4 \text{Li}_2\text{S}_7 \rightarrow 1/2 \text{Li}_2\text{S} + 1/4 \text{Li}_2\text{S}_5$                                | -41.37                  | -1.79 | -54.21                    | -2.35 |
| $\text{Li} + 1/4 \text{Li}_2\text{S}_7 \rightarrow 1/4 \text{Li}_2\text{S} + 1/4 \text{Li}_2\text{S}_{2b} + 1/4 \text{Li}_2\text{S}_4$ | -47.05                  | -2.04 | -59.88                    | -2.60 |
| $\text{Li} + 1/4 \text{Li}_2\text{S}_7 \rightarrow 1/4 \text{Li}_2\text{S} + 1/2 \text{Li}_2\text{S}_3$                                | -48.23                  | -2.09 | -61.06                    | -2.65 |
| $\text{Li} + 1/4 \text{Li}_2\text{S}_7 \rightarrow 1/2 \text{Li}_2\text{S}_2 + 1/4 \text{Li}_2\text{S}_3$                              | -50.80                  | -2.20 | -63.63                    | -2.76 |
| $\text{Li} + 1/6 \text{Li}_2\text{S}_7 \rightarrow 1/2 \text{Li}_2\text{S} + 1/6 \text{Li}_2\text{S}_4$                                | -41.04                  | -1.78 | -53.88                    | -2.34 |
| $\text{Li} + 1/6 \text{Li}_2\text{S}_7 \rightarrow 1/3 \text{Li}_2\text{S} + 1/6 \text{Li}_2\text{S}_2 + 1/6 \text{Li}_2\text{S}_3$    | -43.54                  | -1.89 | -56.37                    | -2.44 |
| $\text{Li} + 1/6 \text{Li}_2\text{S}_7 \rightarrow 1/6 \text{Li}_2\text{S} + 1/2 \text{Li}_2\text{S}_2$                                | -45.25                  | -1.96 | -58.09                    | -2.52 |
| $\text{Li} + 1/8 \text{Li}_2\text{S}_7 \rightarrow 1/2 \text{Li}_2\text{S} + 1/8 \text{Li}_2\text{S}_3$                                | -39.91                  | -1.73 | -52.75                    | -2.29 |
| $\text{Li} + 1/8 \text{Li}_2\text{S}_7 \rightarrow 3/8 \text{Li}_2\text{S} + 1/4 \text{Li}_2\text{S}_2$                                | -41.20                  | -1.79 | -54.03                    | -2.34 |
| $\text{Li} + 1/10 \text{Li}_2\text{S}_7 \rightarrow 1/2 \text{Li}_2\text{S} + 1/10 \text{Li}_2\text{S}_2$                              | -38.76                  | -1.68 | -51.60                    | -2.24 |
| $\text{Li} + 1/12 \text{Li}_2\text{S}_7 \rightarrow 7/12 \text{Li}_2\text{S}$                                                          | -37.14                  | -1.61 | -49.97                    | -2.17 |

14 reactions

TABLE 6S. Heats of reduction reactions of  $\text{Li}_2\text{S}_6$ 

|                                                                                                                                     | $\Delta E_{\text{gas}}$ |       | $\Delta E_{\text{solid}}$ |       |
|-------------------------------------------------------------------------------------------------------------------------------------|-------------------------|-------|---------------------------|-------|
|                                                                                                                                     | kcal/mol                | eV    | kcal/mol                  | eV    |
| $\text{Li} + 1/2 \text{Li}_2\text{S}_6 \rightarrow 1/2 \text{Li}_2\text{S} + 1/2 \text{Li}_2\text{S}_5$                             | -40.54                  | -1.76 | -53.37                    | -2.31 |
| $\text{Li} + 1/2 \text{Li}_2\text{S}_6 \rightarrow 1/2 \text{Li}_2\text{S}_2 + 1/2 \text{Li}_2\text{S}_4$                           | -51.89                  | -2.25 | -64.73                    | -2.81 |
| $\text{Li} + 1/2 \text{Li}_2\text{S}_6 \rightarrow \text{Li}_2\text{S}_3$                                                           | -54.25                  | -2.35 | -67.08                    | -2.91 |
| $\text{Li} + 1/4 \text{Li}_2\text{S}_6 \rightarrow 1/2 \text{Li}_2\text{S} + 1/4 \text{Li}_2\text{S}_4$                             | -40.46                  | -1.75 | -53.29                    | -2.31 |
| $\text{Li} + 1/4 \text{Li}_2\text{S}_6 \rightarrow 1/4 \text{Li}_2\text{S} + 1/4 \text{Li}_2\text{S}_2 + 1/4 \text{Li}_2\text{S}_3$ | -44.21                  | -1.92 | -57.04                    | -2.47 |
| $\text{Li} + 1/4 \text{Li}_2\text{S}_6 \rightarrow 3/4 \text{Li}_2\text{S}_2$                                                       | -46.77                  | -2.03 | -59.61                    | -2.58 |
| $\text{Li} + 1/6 \text{Li}_2\text{S}_6 \rightarrow 1/2 \text{Li}_2\text{S} + 1/6 \text{Li}_2\text{S}_3$                             | -39.15                  | -1.70 | -51.98                    | -2.25 |
| $\text{Li} + 1/6 \text{Li}_2\text{S}_6 \rightarrow 1/3 \text{Li}_2\text{S} + 1/3 \text{Li}_2\text{S}_2$                             | -40.86                  | -1.77 | -53.69                    | -2.33 |
| $\text{Li} + 1/8 \text{Li}_2\text{S}_6 \rightarrow 1/2 \text{Li}_2\text{S} + 1/8 \text{Li}_2\text{S}_2$                             | -37.90                  | -1.64 | -50.73                    | -2.20 |
| $\text{Li} + 1/10 \text{Li}_2\text{S}_6 \rightarrow 3/5 \text{Li}_2\text{S}$                                                        | -36.13                  | -1.57 | -48.96                    | -2.12 |

10 reactions

TABLE 7S. Heats of reduction reactions of  $\text{Li}_2\text{S}_5$ 

|                                                                                                           | $\Delta E_{\text{gas}}$ |       | $\Delta E_{\text{solid}}$ |       |
|-----------------------------------------------------------------------------------------------------------|-------------------------|-------|---------------------------|-------|
|                                                                                                           | kcal/mol                | eV    | kcal/mol                  | eV    |
| $\text{Li} + 1/2 \text{Li}_2\text{S}_5 \rightarrow 1/2 \text{Li}_2\text{S} + 1/2 \text{Li}_2\text{S}_4$   | -40.38                  | -1.75 | -53.22                    | -2.31 |
| $\text{Li} + 1/2 \text{Li}_2\text{S}_5 \rightarrow 1/2 \text{Li}_2\text{S}_2 + 1/2 \text{Li}_2\text{S}_3$ | -47.87                  | -2.08 | -60.71                    | -2.63 |
| $\text{Li} + 1/4 \text{Li}_2\text{S}_5 \rightarrow 1/2 \text{Li}_2\text{S} + 1/4 \text{Li}_2\text{S}_3$   | -38.45                  | -1.67 | -51.28                    | -2.22 |
| $\text{Li} + 1/4 \text{Li}_2\text{S}_5 \rightarrow 1/4 \text{Li}_2\text{S} + 1/2 \text{Li}_2\text{S}_2$   | -41.02                  | -1.78 | -53.85                    | -2.34 |
| $\text{Li} + 1/6 \text{Li}_2\text{S}_5 \rightarrow 1/2 \text{Li}_2\text{S} + 1/6 \text{Li}_2\text{S}_2$   | -37.02                  | -1.61 | -49.86                    | -2.16 |
| $\text{Li} + 1/8 \text{Li}_2\text{S}_5 \rightarrow 5/8 \text{Li}_2\text{S}$                               | -35.02                  | -1.52 | -47.86                    | -2.08 |

6 reactions

TABLE 8S. Heats of reduction reactions of  $\text{Li}_2\text{S}_4$ 

|                                                                                                         | $\Delta E_{\text{gas}}$ |       | $\Delta E_{\text{solid}}$ |       |
|---------------------------------------------------------------------------------------------------------|-------------------------|-------|---------------------------|-------|
|                                                                                                         | kcal/mol                | eV    | kcal/mol                  | eV    |
| $\text{Li} + 1/2 \text{Li}_2\text{S}_4 \rightarrow 1/2 \text{Li}_2\text{S} + 1/2 \text{Li}_2\text{S}_3$ | -36.52                  | -1.58 | -49.35                    | -2.14 |
| $\text{Li} + 1/2 \text{Li}_2\text{S}_4 \rightarrow \text{Li}_2\text{S}_2$                               | -41.66                  | -1.81 | -54.49                    | -2.36 |
| $\text{Li} + 1/4 \text{Li}_2\text{S}_4 \rightarrow 1/2 \text{Li}_2\text{S} + 1/4 \text{Li}_2\text{S}_2$ | -35.34                  | -1.53 | -48.18                    | -2.09 |
| $\text{Li} + 1/6 \text{Li}_2\text{S}_4 \rightarrow 2/3 \text{Li}_2\text{S}$                             | -33.24                  | -1.44 | -46.07                    | -2.00 |

4 reactions

TABLE 9S. Heats of reduction reactions of  $\text{Li}_2\text{S}_3$ 

|                                                                                                         | $\Delta E_{\text{gas}}$ |       | $\Delta E_{\text{solid}}$ |       |
|---------------------------------------------------------------------------------------------------------|-------------------------|-------|---------------------------|-------|
|                                                                                                         | kcal/mol                | eV    | kcal/mol                  | eV    |
| $\text{Li} + 1/2 \text{Li}_2\text{S}_3 \rightarrow 1/2 \text{Li}_2\text{S} + 1/2 \text{Li}_2\text{S}_2$ | -34.17                  | -1.48 | -47.00                    | -2.04 |
| $\text{Li} + 1/4 \text{Li}_2\text{S}_3 \rightarrow 3/4 \text{Li}_2\text{S}$                             | -31.60                  | -1.37 | -44.43                    | -1.93 |

2 reactions

TABLE 10S. Heats of reduction reactions of  $\text{Li}_2\text{S}_2$ 

|                                                                         | $\Delta E_{\text{gas}}$ |       | $\Delta E_{\text{solid}}$ |       |
|-------------------------------------------------------------------------|-------------------------|-------|---------------------------|-------|
|                                                                         | kcal/mol                | eV    | kcal/mol                  | eV    |
| $\text{Li} + 1/2 \text{Li}_2\text{S}_2 \rightarrow \text{Li}_2\text{S}$ | -29.03                  | -1.26 | -41.86                    | -1.82 |

1 reaction



TABLE 11S. Heats of oxidation reactions of Li<sub>2</sub>S

|                                                                   | $\Delta E_{\text{gas}}$ |      | $\Delta E_{\text{solid}}$ |      |
|-------------------------------------------------------------------|-------------------------|------|---------------------------|------|
|                                                                   | kcal/mol                | eV   | kcal/mol                  | eV   |
| Li <sub>2</sub> S → Li + 1/2 Li <sub>2</sub> S <sub>2</sub>       | 29.03                   | 1.26 | 41.86                     | 1.82 |
| 3/4 Li <sub>2</sub> S → Li + 1/4 Li <sub>2</sub> S <sub>3</sub>   | 31.60                   | 1.37 | 44.43                     | 1.93 |
| 2/3 Li <sub>2</sub> S → Li + 1/6 Li <sub>2</sub> S <sub>4</sub>   | 33.24                   | 1.44 | 46.07                     | 2.00 |
| 5/8 Li <sub>2</sub> S → Li + 1/8 Li <sub>2</sub> S <sub>5</sub>   | 35.02                   | 1.52 | 47.86                     | 2.08 |
| 3/5 Li <sub>2</sub> S → Li + 1/10 Li <sub>2</sub> S <sub>6</sub>  | 36.13                   | 1.57 | 48.96                     | 2.12 |
| 7/12 Li <sub>2</sub> S → Li + 1/12 Li <sub>2</sub> S <sub>7</sub> | 37.14                   | 1.61 | 49.97                     | 2.17 |
| 4/7 Li <sub>2</sub> S → Li + 1/14 Li <sub>2</sub> S <sub>8</sub>  | 37.76                   | 1.64 | 50.60                     | 2.19 |
| 1/2 Li <sub>2</sub> S → Li + 1/16 S <sub>8</sub>                  | 42.36                   | 1.84 | 53.72                     | 2.33 |

|           |
|-----------|
| < 1.8     |
| 1.8 ~ 2.0 |
| 2.0 ~ 2.2 |
| 2.2 ~ 2.4 |
| 2.4 ~ 2.6 |
| 2.6 ~ 2.8 |
| 2.8 ~ 3.0 |
| 3.0 ~ 3.2 |
| 3.2 <     |

8 reactions

TABLE 12S. Heats of oxidation reactions of  $\text{Li}_2\text{S}_2$ 

|                                                                                                           | $\Delta E_{\text{gas}}$ |      | $\Delta E_{\text{solid}}$ |      |
|-----------------------------------------------------------------------------------------------------------|-------------------------|------|---------------------------|------|
|                                                                                                           | kcal/mol                | eV   | kcal/mol                  | eV   |
| $1/2 \text{Li}_2\text{S} + 1/2 \text{Li}_2\text{S}_2 \rightarrow \text{Li} + 1/2 \text{Li}_2\text{S}_3$   | 34.17                   | 1.48 | 47.00                     | 2.04 |
| $1/2 \text{Li}_2\text{S} + 1/4 \text{Li}_2\text{S}_2 \rightarrow \text{Li} + 1/4 \text{Li}_2\text{S}_4$   | 35.34                   | 1.53 | 48.18                     | 2.09 |
| $\text{Li}_2\text{S}_2 \rightarrow \text{Li} + 1/2 \text{Li}_2\text{S}_4$                                 | 41.66                   | 1.81 | 54.49                     | 2.36 |
| $1/2 \text{Li}_2\text{S} + 1/6 \text{Li}_2\text{S}_2 \rightarrow \text{Li} + 1/6 \text{Li}_2\text{S}_5$   | 37.02                   | 1.61 | 49.86                     | 2.16 |
| $1/4 \text{Li}_2\text{S} + 1/2 \text{Li}_2\text{S}_2 \rightarrow \text{Li} + 1/4 \text{Li}_2\text{S}_5$   | 41.02                   | 1.78 | 53.85                     | 2.34 |
| $1/2 \text{Li}_2\text{S} + 1/8 \text{Li}_2\text{S}_2 \rightarrow \text{Li} + 1/8 \text{Li}_2\text{S}_6$   | 37.90                   | 1.64 | 50.73                     | 2.20 |
| $1/3 \text{Li}_2\text{S} + 1/3 \text{Li}_2\text{S}_2 \rightarrow \text{Li} + 1/6 \text{Li}_2\text{S}_6$   | 40.86                   | 1.77 | 53.69                     | 2.33 |
| $3/4 \text{Li}_2\text{S}_2 \rightarrow \text{Li} + 1/4 \text{Li}_2\text{S}_6$                             | 46.77                   | 2.03 | 59.61                     | 2.58 |
| $1/2 \text{Li}_2\text{S} + 1/10 \text{Li}_2\text{S}_2 \rightarrow \text{Li} + 1/10 \text{Li}_2\text{S}_7$ | 38.76                   | 1.68 | 51.60                     | 2.24 |
| $3/8 \text{Li}_2\text{S} + 1/4 \text{Li}_2\text{S}_2 \rightarrow \text{Li} + 1/8 \text{Li}_2\text{S}_7$   | 41.20                   | 1.79 | 54.03                     | 2.34 |
| $1/6 \text{Li}_2\text{S} + 1/2 \text{Li}_2\text{S}_2 \rightarrow \text{Li} + 1/6 \text{Li}_2\text{S}_7$   | 45.25                   | 1.96 | 58.09                     | 2.52 |
| $1/2 \text{Li}_2\text{S} + 1/12 \text{Li}_2\text{S}_2 \rightarrow \text{Li} + 1/12 \text{Li}_2\text{S}_8$ | 39.22                   | 1.70 | 52.05                     | 2.26 |
| $2/5 \text{Li}_2\text{S} + 1/5 \text{Li}_2\text{S}_2 \rightarrow \text{Li} + 1/10 \text{Li}_2\text{S}_8$  | 41.26                   | 1.79 | 54.09                     | 2.35 |
| $1/4 \text{Li}_2\text{S} + 3/8 \text{Li}_2\text{S}_2 \rightarrow \text{Li} + 1/8 \text{Li}_2\text{S}_8$   | 44.32                   | 1.92 | 57.15                     | 2.48 |
| $2/3 \text{Li}_2\text{S}_2 \rightarrow \text{Li} + 1/6 \text{Li}_2\text{S}_8$                             | 49.41                   | 2.14 | 62.25                     | 2.70 |
| $3/7 \text{Li}_2\text{S} + 1/14 \text{Li}_2\text{S}_2 \rightarrow \text{Li} + 1/14 \text{S}_8$            | 44.27                   | 1.92 | 55.42                     | 2.40 |
| $1/3 \text{Li}_2\text{S} + 1/6 \text{Li}_2\text{S}_2 \rightarrow \text{Li} + 1/12 \text{S}_8$             | 46.81                   | 2.03 | 57.68                     | 2.50 |
| $1/5 \text{Li}_2\text{S} + 3/10 \text{Li}_2\text{S}_2 \rightarrow \text{Li} + 1/10 \text{S}_8$            | 50.36                   | 2.18 | 60.84                     | 2.64 |
| $1/2 \text{Li}_2\text{S}_2 \rightarrow \text{Li} + 1/8 \text{S}_8$                                        | 55.70                   | 2.42 | 65.58                     | 2.84 |

19 reactions

TABLE 13S. Heats of oxidation reactions of  $\text{Li}_2\text{S}_3$ 

|                                                                                                                                     | $\Delta E_{\text{gas}}$ |      | $\Delta E_{\text{solid}}$ |      |
|-------------------------------------------------------------------------------------------------------------------------------------|-------------------------|------|---------------------------|------|
|                                                                                                                                     | kcal/mol                | eV   | kcal/mol                  | eV   |
| $1/2 \text{Li}_2\text{S} + 1/2 \text{Li}_2\text{S}_3 \rightarrow \text{Li} + 1/2 \text{Li}_2\text{S}_4$                             | 36.52                   | 1.58 | 49.35                     | 2.14 |
| $1/2 \text{Li}_2\text{S} + 1/4 \text{Li}_2\text{S}_3 \rightarrow \text{Li} + 1/4 \text{Li}_2\text{S}_5$                             | 38.45                   | 1.67 | 51.28                     | 2.22 |
| $1/2 \text{Li}_2\text{S}_2 + 1/2 \text{Li}_2\text{S}_3 \rightarrow \text{Li} + 1/2 \text{Li}_2\text{S}_5$                           | 47.87                   | 2.08 | 60.71                     | 2.63 |
| $1/2 \text{Li}_2\text{S} + 1/6 \text{Li}_2\text{S}_3 \rightarrow \text{Li} + 1/6 \text{Li}_2\text{S}_6$                             | 39.15                   | 1.70 | 51.98                     | 2.25 |
| $1/4 \text{Li}_2\text{S} + 1/4 \text{Li}_2\text{S}_2 + 1/4 \text{Li}_2\text{S}_3 \rightarrow \text{Li} + 1/4 \text{Li}_2\text{S}_6$ | 44.21                   | 1.92 | 57.04                     | 2.47 |
| $\text{Li}_2\text{S}_3 \rightarrow \text{Li} + 1/2 \text{Li}_2\text{S}_6$                                                           | 54.25                   | 2.35 | 67.08                     | 2.91 |
| $1/2 \text{Li}_2\text{S} + 1/8 \text{Li}_2\text{S}_3 \rightarrow \text{Li} + 1/8 \text{Li}_2\text{S}_7$                             | 39.91                   | 1.73 | 52.75                     | 2.29 |
| $1/3 \text{Li}_2\text{S} + 1/6 \text{Li}_2\text{S}_2 + 1/6 \text{Li}_2\text{S}_3 \rightarrow \text{Li} + 1/6 \text{Li}_2\text{S}_7$ | 43.54                   | 1.89 | 56.37                     | 2.44 |
| $1/2 \text{Li}_2\text{S}_2 + 1/4 \text{Li}_2\text{S}_3 \rightarrow \text{Li} + 1/4 \text{Li}_2\text{S}_7$                           | 50.80                   | 2.20 | 63.63                     | 2.76 |
| $1/4 \text{Li}_2\text{S} + 1/2 \text{Li}_2\text{S}_3 \rightarrow \text{Li} + 1/4 \text{Li}_2\text{S}_7$                             | 48.23                   | 2.09 | 61.06                     | 2.65 |
| $1/2 \text{Li}_2\text{S} + 1/10 \text{Li}_2\text{S}_3 \rightarrow \text{Li} + 1/10 \text{Li}_2\text{S}_8$                           | 40.23                   | 1.74 | 53.06                     | 2.30 |
| $3/8 \text{Li}_2\text{S} + 1/8 \text{Li}_2\text{S}_2 + 1/8 \text{Li}_2\text{S}_3 \rightarrow \text{Li} + 1/8 \text{Li}_2\text{S}_8$ | 43.03                   | 1.87 | 55.87                     | 2.42 |
| $1/6 \text{Li}_2\text{S} + 1/3 \text{Li}_2\text{S}_2 + 1/6 \text{Li}_2\text{S}_3 \rightarrow \text{Li} + 1/6 \text{Li}_2\text{S}_8$ | 47.70                   | 2.07 | 60.53                     | 2.63 |
| $1/3 \text{Li}_2\text{S} + 1/3 \text{Li}_2\text{S}_3 \rightarrow \text{Li} + 1/6 \text{Li}_2\text{S}_8$                             | 45.99                   | 1.99 | 58.82                     | 2.55 |
| $1/4 \text{Li}_2\text{S}_2 + 1/2 \text{Li}_2\text{S}_3 \rightarrow \text{Li} + 1/4 \text{Li}_2\text{S}_8$                           | 54.47                   | 2.36 | 67.30                     | 2.92 |
| $5/12 \text{Li}_2\text{S} + 1/12 \text{Li}_2\text{S}_3 \rightarrow \text{Li} + 1/12 \text{S}_8$                                     | 45.95                   | 1.99 | 56.82                     | 2.46 |
| $3/10 \text{Li}_2\text{S} + 1/10 \text{Li}_2\text{S}_2 + 1/10 \text{Li}_2\text{S}_3 \rightarrow \text{Li} + 1/10 \text{S}_8$        | 49.33                   | 2.14 | 59.81                     | 2.59 |
| $1/8 \text{Li}_2\text{S} + 1/4 \text{Li}_2\text{S}_2 + 1/8 \text{Li}_2\text{S}_3 \rightarrow \text{Li} + 1/8 \text{S}_8$            | 54.41                   | 2.36 | 64.30                     | 2.79 |
| $1/4 \text{Li}_2\text{S} + 1/4 \text{Li}_2\text{S}_3 \rightarrow \text{Li} + 1/8 \text{S}_8$                                        | 53.13                   | 2.30 | 63.01                     | 2.73 |
| $1/6 \text{Li}_2\text{S}_2 + 1/3 \text{Li}_2\text{S}_3 \rightarrow \text{Li} + 1/6 \text{S}_8$                                      | 61.16                   | 2.65 | 70.06                     | 3.04 |

20 reactions

TABLE 14S. Heats of oxidation reactions of Li<sub>2</sub>S<sub>4</sub>

|                                                                                                                                         | $\Delta E_{\text{gas}}$ |      | $\Delta E_{\text{solid}}$ |      |
|-----------------------------------------------------------------------------------------------------------------------------------------|-------------------------|------|---------------------------|------|
|                                                                                                                                         | kcal/mol                | eV   | kcal/mol                  | eV   |
| $1/2 \text{ Li}_2\text{S} + 1/2 \text{ Li}_2\text{S}_4 \rightarrow \text{Li} + 1/2 \text{ Li}_2\text{S}_5$                              | 40.38                   | 1.75 | 53.22                     | 2.31 |
| $1/2 \text{ Li}_2\text{S} + 1/4 \text{ Li}_2\text{S}_4 \rightarrow \text{Li} + 1/4 \text{ Li}_2\text{S}_6$                              | 40.46                   | 1.75 | 53.29                     | 2.31 |
| $1/2 \text{ Li}_2\text{S}_2 + 1/2 \text{ Li}_2\text{S}_4 \rightarrow \text{Li} + 1/2 \text{ Li}_2\text{S}_6$                            | 51.89                   | 2.25 | 64.73                     | 2.81 |
| $1/2 \text{ Li}_2\text{S} + 1/6 \text{ Li}_2\text{S}_4 \rightarrow \text{Li} + 1/6 \text{ Li}_2\text{S}_7$                              | 41.04                   | 1.78 | 53.88                     | 2.34 |
| $1/4 \text{ Li}_2\text{S} + 1/4 \text{ Li}_2\text{S}_2 + 1/4 \text{ Li}_2\text{S}_4 \rightarrow \text{Li} + 1/4 \text{ Li}_2\text{S}_7$ | 47.05                   | 2.04 | 59.88                     | 2.60 |
| $1/2 \text{ Li}_2\text{S}_3 + 1/2 \text{ Li}_2\text{S}_4 \rightarrow \text{Li} + 1/2 \text{ Li}_2\text{S}_7$                            | 59.94                   | 2.60 | 72.77                     | 3.16 |
| $1/2 \text{ Li}_2\text{S} + 1/8 \text{ Li}_2\text{S}_4 \rightarrow \text{Li} + 1/8 \text{ Li}_2\text{S}_8$                              | 41.16                   | 1.78 | 53.99                     | 2.34 |
| $1/3 \text{ Li}_2\text{S} + 1/6 \text{ Li}_2\text{S}_2 + 1/6 \text{ Li}_2\text{S}_4 \rightarrow \text{Li} + 1/6 \text{ Li}_2\text{S}_8$ | 45.20                   | 1.96 | 58.04                     | 2.52 |
| $1/2 \text{ Li}_2\text{S}_2 + 1/4 \text{ Li}_2\text{S}_4 \rightarrow \text{Li} + 1/4 \text{ Li}_2\text{S}_8$                            | 53.29                   | 2.31 | 66.13                     | 2.87 |
| $1/4 \text{ Li}_2\text{S} + 1/4 \text{ Li}_2\text{S}_3 + 1/4 \text{ Li}_2\text{S}_4 \rightarrow \text{Li} + 1/4 \text{ Li}_2\text{S}_8$ | 50.72                   | 2.20 | 63.56                     | 2.76 |
| $2/5 \text{ Li}_2\text{S} + 1/10 \text{ Li}_2\text{S}_4 \rightarrow \text{Li} + 1/10 \text{ S}_8$                                       | 47.84                   | 2.07 | 58.31                     | 2.53 |
| $1/4 \text{ Li}_2\text{S} + 1/8 \text{ Li}_2\text{S}_2 + 1/8 \text{ Li}_2\text{S}_4 \rightarrow \text{Li} + 1/8 \text{ S}_8$            | 52.54                   | 2.28 | 62.43                     | 2.71 |
| $\text{Li}_2\text{S}_4 \rightarrow \text{Li} + 1/2 \text{ Li}_2\text{S}_8$                                                              | 64.93                   | 2.82 | 77.76                     | 3.37 |
| $1/3 \text{ Li}_2\text{S}_2 + 1/6 \text{ Li}_2\text{S}_4 \rightarrow \text{Li} + 1/6 \text{ S}_8$                                       | 60.38                   | 2.62 | 69.28                     | 3.00 |
| $1/6 \text{ Li}_2\text{S} + 1/6 \text{ Li}_2\text{S}_3 + 1/6 \text{ Li}_2\text{S}_4 \rightarrow \text{Li} + 1/6 \text{ S}_8$            | 58.66                   | 2.54 | 67.57                     | 2.93 |
| $1/2 \text{ Li}_2\text{S}_4 \rightarrow \text{Li} + 1/4 \text{ S}_8$                                                                    | 69.74                   | 3.02 | 76.67                     | 3.33 |

16 reactions

TABLE 15S. Heats of oxidation reactions of Li<sub>2</sub>S<sub>5</sub>

|                                                                                                                                         | $\Delta E_{\text{gas}}$ |      | $\Delta E_{\text{solid}}$ |      |
|-----------------------------------------------------------------------------------------------------------------------------------------|-------------------------|------|---------------------------|------|
|                                                                                                                                         | kcal/mol                | eV   | kcal/mol                  | eV   |
| $1/2 \text{ Li}_2\text{S} + 1/2 \text{ Li}_2\text{S}_5 \rightarrow \text{Li} + 1/2 \text{ Li}_2\text{S}_6$                              | 40.54                   | 1.76 | 53.37                     | 2.31 |
| $1/2 \text{ Li}_2\text{S} + 1/4 \text{ Li}_2\text{S}_5 \rightarrow \text{Li} + 1/4 \text{ Li}_2\text{S}_7$                              | 41.37                   | 1.79 | 54.21                     | 2.35 |
| $1/2 \text{ Li}_2\text{S}_2 + 1/2 \text{ Li}_2\text{S}_5 \rightarrow \text{Li} + 1/2 \text{ Li}_2\text{S}_7$                            | 53.72                   | 2.33 | 66.55                     | 2.89 |
| $1/2 \text{ Li}_2\text{S} + 1/6 \text{ Li}_2\text{S}_5 \rightarrow \text{Li} + 1/6 \text{ Li}_2\text{S}_8$                              | 41.42                   | 1.80 | 54.25                     | 2.35 |
| $1/4 \text{ Li}_2\text{S} + 1/4 \text{ Li}_2\text{S}_2 + 1/4 \text{ Li}_2\text{S}_5 \rightarrow \text{Li} + 1/4 \text{ Li}_2\text{S}_8$ | 47.61                   | 2.06 | 60.45                     | 2.62 |
| $1/2 \text{ Li}_2\text{S}_3 + 1/2 \text{ Li}_2\text{S}_5 \rightarrow \text{Li} + 1/2 \text{ Li}_2\text{S}_8$                            | 61.06                   | 2.65 | 73.90                     | 3.20 |
| $3/8 \text{ Li}_2\text{S} + 1/8 \text{ Li}_2\text{S}_5 \rightarrow \text{Li} + 1/8 \text{ S}_8$                                         | 49.70                   | 2.16 | 59.59                     | 2.58 |
| $1/6 \text{ Li}_2\text{S} + 1/6 \text{ Li}_2\text{S}_2 + 1/6 \text{ Li}_2\text{S}_5 \rightarrow \text{Li} + 1/6 \text{ S}_8$            | 56.59                   | 2.45 | 65.49                     | 2.84 |
| $1/4 \text{ Li}_2\text{S}_3 + 1/4 \text{ Li}_2\text{S}_5 \rightarrow \text{Li} + 1/4 \text{ S}_8$                                       | 67.80                   | 2.94 | 74.74                     | 3.24 |

9 reactions

TABLE 16S. Heats of oxidation reactions of Li<sub>2</sub>S<sub>6</sub>

|                                                                                                              | $\Delta E_{\text{gas}}$ |      | $\Delta E_{\text{solid}}$ |      |
|--------------------------------------------------------------------------------------------------------------|-------------------------|------|---------------------------|------|
|                                                                                                              | kcal/mol                | eV   | kcal/mol                  | eV   |
| $1/2 \text{ Li}_2\text{S} + 1/2 \text{ Li}_2\text{S}_6 \rightarrow \text{Li} + 1/2 \text{ Li}_2\text{S}_7$   | 42.21                   | 1.83 | 55.04                     | 2.39 |
| $1/2 \text{ Li}_2\text{S} + 1/4 \text{ Li}_2\text{S}_6 \rightarrow \text{Li} + 1/4 \text{ Li}_2\text{S}_8$   | 41.86                   | 1.82 | 54.69                     | 2.37 |
| $1/2 \text{ Li}_2\text{S}_2 + 1/2 \text{ Li}_2\text{S}_6 \rightarrow \text{Li} + 1/2 \text{ Li}_2\text{S}_8$ | 54.69                   | 2.37 | 67.53                     | 2.93 |
| $1/3 \text{ Li}_2\text{S} + 1/6 \text{ Li}_2\text{S}_6 \rightarrow \text{Li} + 1/6 \text{ S}_8$              | 52.75                   | 2.29 | 61.66                     | 2.67 |
| $1/4 \text{ Li}_2\text{S}_2 + 1/4 \text{ Li}_2\text{S}_6 \rightarrow \text{Li} + 1/4 \text{ S}_8$            | 64.62                   | 2.80 | 71.56                     | 3.10 |

5 reactions

TABLE 17S. Heats of oxidation reactions of Li<sub>2</sub>S<sub>7</sub>

|                                                                                                            | $\Delta E_{\text{gas}}$ |      | $\Delta E_{\text{solid}}$ |      |
|------------------------------------------------------------------------------------------------------------|-------------------------|------|---------------------------|------|
|                                                                                                            | kcal/mol                | eV   | kcal/mol                  | eV   |
| $1/2 \text{ Li}_2\text{S} + 1/2 \text{ Li}_2\text{S}_7 \rightarrow \text{Li} + 1/2 \text{ Li}_2\text{S}_8$ | 41.51                   | 1.80 | 54.34                     | 2.36 |
| $1/4 \text{ Li}_2\text{S} + 1/4 \text{ Li}_2\text{S}_7 \rightarrow \text{Li} + 1/4 \text{ S}_8$            | 58.03                   | 2.52 | 64.97                     | 2.82 |

2 reactions

TABLE 18S. Heats of oxidation reactions of Li<sub>2</sub>S<sub>8</sub>

|                                                                      | $\Delta E_{\text{gas}}$ |      | $\Delta E_{\text{solid}}$ |      |
|----------------------------------------------------------------------|-------------------------|------|---------------------------|------|
|                                                                      | kcal/mol                | eV   | kcal/mol                  | eV   |
| $1/2 \text{ Li}_2\text{S}_8 \rightarrow \text{Li} + 1/2 \text{ S}_8$ | 74.54                   | 3.23 | 75.59                     | 3.28 |

1 reaction

TABLE 19S. Heat of reduction reactions for formation of  $\text{Li}_2\text{S}_2$  from  $\text{S}_8$  or  $\text{Li}_2\text{S}_n$  with  $\text{Li}^a$

|                                                                                                                                     | $\Delta E_{\text{gas}}$ | $\Delta E_{\text{solid}}$ |
|-------------------------------------------------------------------------------------------------------------------------------------|-------------------------|---------------------------|
| $\text{Li} + 1/4 \text{S}_8 \rightarrow 1/4 \text{Li}_2\text{S}_2 + 1/4 \text{Li}_2\text{S}_6$                                      | -2.80                   | -3.10                     |
| $\text{Li} + 1/6 \text{S}_8 \rightarrow 1/6 \text{Li}_2\text{S} + 1/6 \text{Li}_2\text{S}_2 + 1/6 \text{Li}_2\text{S}_5$            | -2.45                   | -2.84                     |
| $\text{Li} + 1/6 \text{S}_8 \rightarrow 1/3 \text{Li}_2\text{S}_2 + 1/6 \text{Li}_2\text{S}_4$                                      | -2.62                   | -3.00                     |
| $\text{Li} + 1/6 \text{S}_8 \rightarrow 1/6 \text{Li}_2\text{S}_2 + 1/3 \text{Li}_2\text{S}_3$                                      | -2.65                   | -3.04                     |
| $\text{Li} + 1/8 \text{S}_8 \rightarrow 1/4 \text{Li}_2\text{S} + 1/8 \text{Li}_2\text{S}_2 + 1/8 \text{Li}_2\text{S}_4$            | -2.28                   | -2.71                     |
| $\text{Li} + 1/8 \text{S}_8 \rightarrow 1/8 \text{Li}_2\text{S} + 1/4 \text{Li}_2\text{S}_2 + 1/8 \text{Li}_2\text{S}_3$            | -2.36                   | -2.79                     |
| $\text{Li} + 1/8 \text{S}_8 \rightarrow 1/2 \text{Li}_2\text{S}_2$                                                                  | -2.42                   | -2.84                     |
| $\text{Li} + 1/10 \text{S}_8 \rightarrow 3/10 \text{Li}_2\text{S} + 1/10 \text{Li}_2\text{S}_2 + 1/10 \text{Li}_2\text{S}_3$        | -2.14                   | -2.59                     |
| $\text{Li} + 1/10 \text{S}_8 \rightarrow 1/5 \text{Li}_2\text{S} + 3/10 \text{Li}_2\text{S}_2$                                      | -2.18                   | -2.64                     |
| $\text{Li} + 1/12 \text{S}_8 \rightarrow 1/3 \text{Li}_2\text{S} + 1/6 \text{Li}_2\text{S}_2$                                       | -2.03                   | -2.50                     |
| $\text{Li} + 1/14 \text{S}_8 \rightarrow 3/7 \text{Li}_2\text{S} + 1/14 \text{Li}_2\text{S}_2$                                      | -1.92                   | -2.40                     |
| $\text{Li} + 1/2 \text{Li}_2\text{S}_8 \rightarrow 1/2 \text{Li}_2\text{S}_2 + 1/2 \text{Li}_2\text{S}_6$                           | -2.37                   | -2.93                     |
| $\text{Li} + 1/4 \text{Li}_2\text{S}_8 \rightarrow 1/4 \text{Li}_2\text{S} + 1/4 \text{Li}_2\text{S}_2 + 1/4 \text{Li}_2\text{S}_5$ | -2.06                   | -2.62                     |
| $\text{Li} + 1/4 \text{Li}_2\text{S}_8 \rightarrow 1/2 \text{Li}_2\text{S}_2 + 1/4 \text{Li}_2\text{S}_4$                           | -2.31                   | -2.87                     |
| $\text{Li} + 1/4 \text{Li}_2\text{S}_8 \rightarrow 1/4 \text{Li}_2\text{S}_2 + 1/2 \text{Li}_2\text{S}_3$                           | -2.36                   | -2.92                     |
| $\text{Li} + 1/6 \text{Li}_2\text{S}_8 \rightarrow 1/3 \text{Li}_2\text{S} + 1/6 \text{Li}_2\text{S}_2 + 1/6 \text{Li}_2\text{S}_4$ | -1.96                   | -2.52                     |
| $\text{Li} + 1/6 \text{Li}_2\text{S}_8 \rightarrow 1/6 \text{Li}_2\text{S} + 1/3 \text{Li}_2\text{S}_2 + 1/6 \text{Li}_2\text{S}_3$ | -2.07                   | -2.63                     |
| $\text{Li} + 1/6 \text{Li}_2\text{S}_8 \rightarrow 2/3 \text{Li}_2\text{S}_2$                                                       | -2.14                   | -2.70                     |
| $\text{Li} + 1/8 \text{Li}_2\text{S}_8 \rightarrow 3/8 \text{Li}_2\text{S} + 1/8 \text{Li}_2\text{S}_2 + 1/8 \text{Li}_2\text{S}_3$ | -1.87                   | -2.42                     |
| $\text{Li} + 1/8 \text{Li}_2\text{S}_8 \rightarrow 1/4 \text{Li}_2\text{S} + 3/8 \text{Li}_2\text{S}_2$                             | -1.92                   | -2.48                     |
| $\text{Li} + 1/10 \text{Li}_2\text{S}_8 \rightarrow 2/5 \text{Li}_2\text{S} + 1/5 \text{Li}_2\text{S}_2$                            | -1.79                   | -2.35                     |
| $\text{Li} + 1/12 \text{Li}_2\text{S}_8 \rightarrow 1/2 \text{Li}_2\text{S} + 1/12 \text{Li}_2\text{S}_2$                           | -1.70                   | -2.26                     |
| $\text{Li} + 1/2 \text{Li}_2\text{S}_7 \rightarrow 1/2 \text{Li}_2\text{S}_2 + 1/2 \text{Li}_2\text{S}_5$                           | -2.33                   | -2.89                     |
| $\text{Li} + 1/4 \text{Li}_2\text{S}_7 \rightarrow 1/4 \text{Li}_2\text{S} + 1/4 \text{Li}_2\text{S}_2 + 1/4 \text{Li}_2\text{S}_4$ | -2.04                   | -2.60                     |
| $\text{Li} + 1/4 \text{Li}_2\text{S}_7 \rightarrow 1/2 \text{Li}_2\text{S}_2 + 1/4 \text{Li}_2\text{S}_3$                           | -2.20                   | -2.76                     |
| $\text{Li} + 1/6 \text{Li}_2\text{S}_7 \rightarrow 1/3 \text{Li}_2\text{S} + 1/6 \text{Li}_2\text{S}_2 + 1/6 \text{Li}_2\text{S}_3$ | -1.89                   | -2.44                     |
| $\text{Li} + 1/6 \text{Li}_2\text{S}_7 \rightarrow 1/6 \text{Li}_2\text{S} + 1/2 \text{Li}_2\text{S}_2$                             | -1.96                   | -2.52                     |
| $\text{Li} + 1/8 \text{Li}_2\text{S}_7 \rightarrow 3/8 \text{Li}_2\text{S} + 1/4 \text{Li}_2\text{S}_2$                             | -1.79                   | -2.34                     |
| $\text{Li} + 1/10 \text{Li}_2\text{S}_7 \rightarrow 1/2 \text{Li}_2\text{S} + 1/10 \text{Li}_2\text{S}_2$                           | -1.68                   | -2.24                     |
| $\text{Li} + 1/2 \text{Li}_2\text{S}_6 \rightarrow 1/2 \text{Li}_2\text{S}_2 + 1/2 \text{Li}_2\text{S}_4$                           | -2.25                   | -2.81                     |
| $\text{Li} + 1/4 \text{Li}_2\text{S}_6 \rightarrow 1/4 \text{Li}_2\text{S} + 1/4 \text{Li}_2\text{S}_2 + 1/4 \text{Li}_2\text{S}_3$ | -1.92                   | -2.47                     |
| $\text{Li} + 1/4 \text{Li}_2\text{S}_6 \rightarrow 3/4 \text{Li}_2\text{S}_2$                                                       | -2.03                   | -2.58                     |
| $\text{Li} + 1/6 \text{Li}_2\text{S}_6 \rightarrow 1/3 \text{Li}_2\text{S} + 1/3 \text{Li}_2\text{S}_2$                             | -1.77                   | -2.33                     |
| $\text{Li} + 1/8 \text{Li}_2\text{S}_6 \rightarrow 1/2 \text{Li}_2\text{S} + 1/8 \text{Li}_2\text{S}_2$                             | -1.64                   | -2.20                     |
| $\text{Li} + 1/2 \text{Li}_2\text{S}_5 \rightarrow 1/2 \text{Li}_2\text{S}_2 + 1/2 \text{Li}_2\text{S}_3$                           | -2.08                   | -2.63                     |
| $\text{Li} + 1/4 \text{Li}_2\text{S}_5 \rightarrow 1/4 \text{Li}_2\text{S} + 1/2 \text{Li}_2\text{S}_2$                             | -1.78                   | -2.34                     |
| $\text{Li} + 1/6 \text{Li}_2\text{S}_5 \rightarrow 1/2 \text{Li}_2\text{S} + 1/6 \text{Li}_2\text{S}_2$                             | -1.61                   | -2.16                     |
| $\text{Li} + 1/2 \text{Li}_2\text{S}_4 \rightarrow \text{Li}_2\text{S}_2$                                                           | -1.81                   | -2.36                     |
| $\text{Li} + 1/4 \text{Li}_2\text{S}_4 \rightarrow 1/2 \text{Li}_2\text{S} + 1/4 \text{Li}_2\text{S}_2$                             | -1.53                   | -2.09                     |
| $\text{Li} + 1/2 \text{Li}_2\text{S}_3 \rightarrow 1/2 \text{Li}_2\text{S} + 1/2 \text{Li}_2\text{S}_2$                             | -1.48                   | -2.04                     |

40 reaction

<sup>a</sup> Heats of reactions are normalized as one electron reactions. Energies in eV.

TABLE 20S. Solvation energies in sulfolane calculated for  $S_8$  and  $S_n^{2-}$  ( $n = 1-8$ ) in kcal/mol.

|                  | $E_{\text{solv}}$ |
|------------------|-------------------|
| $S_8$ (8a)       | -1.4              |
| $S^{2-}$ (17)    | -277.7            |
| $S_2^{2-}$ (18)  | -235.2            |
| $S_3^{2-}$ (19a) | -209.5            |
| $S_4^{2-}$ (20a) | -190.8            |
| $S_5^{2-}$ (21a) | -175.9            |
| $S_6^{2-}$ (22a) | -164.3            |
| $S_7^{2-}$ (23a) | -154.9            |
| $S_8^{2-}$ (24a) | -147.1            |

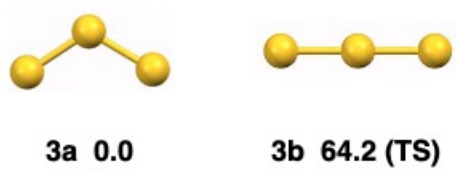

Figure 1S. Optimized geometries for isomers of S<sub>3</sub> and their relative energies in kcal/mol.

**3b** is a transition state.



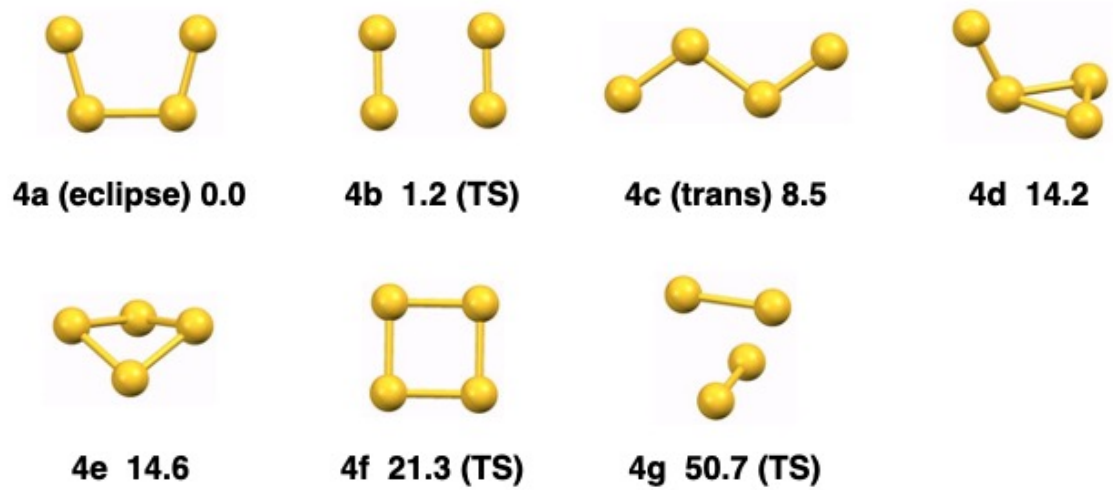

Figure 2S. Optimized geometries for isomers of S<sub>4</sub> and their relative energies in kcal/mol.

**4b**, **4f** and **4g** are transition states.

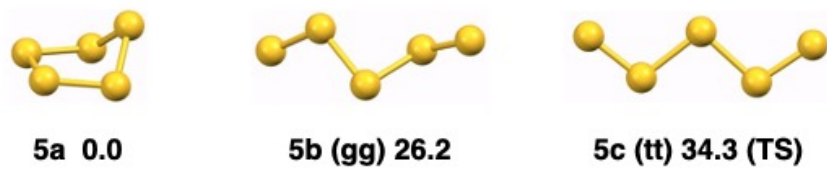

Figure 3S. Optimized geometries for isomers of  $S_5$  and their relative energies in kcal/mol.

**5c** is a transition state.

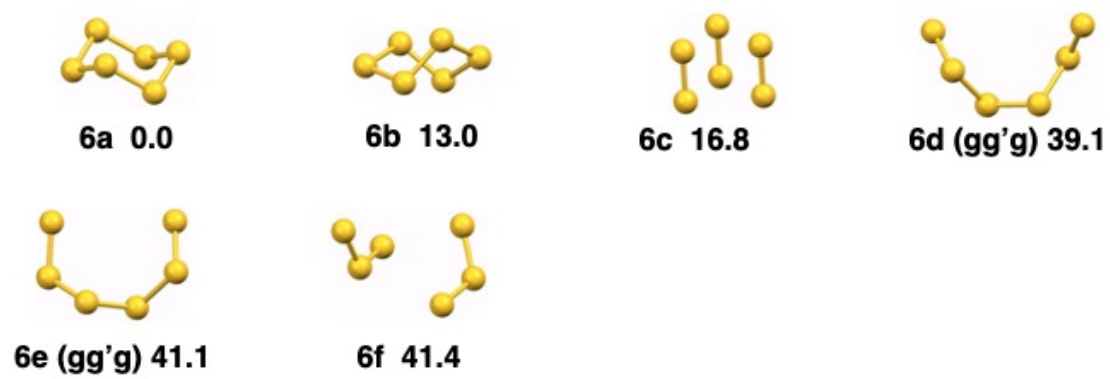

Figure 4S. Optimized geometries for isomers of S<sub>6</sub> and their relative energies in kcal/mol.

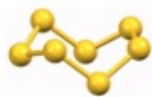

**7a 0.0**

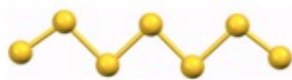

**7b (tttt) 66.51**

Figure 5S. Optimized geometries for isomers of  $S_7$  and their relative energies in kcal/mol.

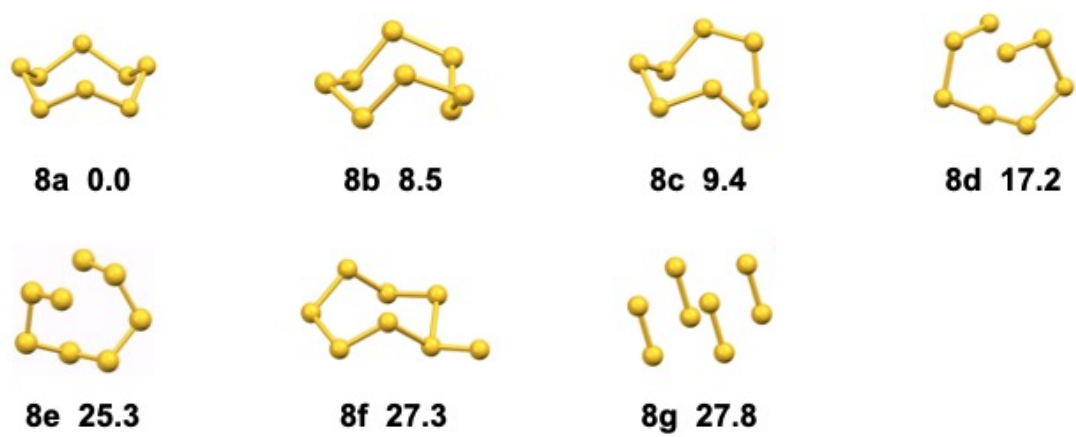

Figure 6S. Optimized geometries for isomers of S<sub>8</sub> and their relative energies in kcal/mol.

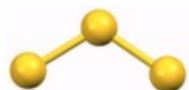

**11a 0.0**

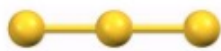

**11b 57.4 (TS)**

Figure 7S. Optimized geometries for isomers of  $S_3^{\cdot-}$  and their relative energies in kcal/mol. **11b** is a transition state.

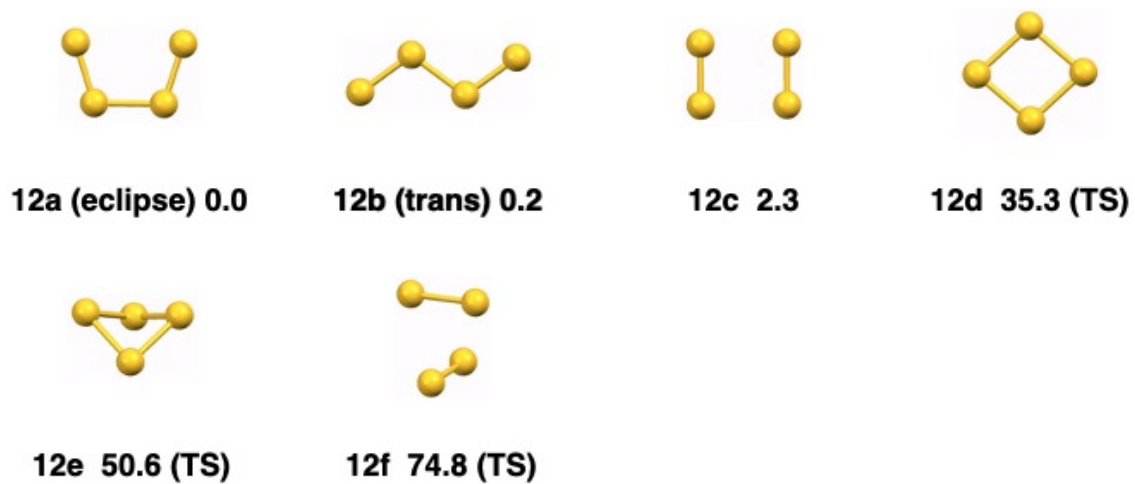

Figure 8S. Optimized geometries for isomers of  $S_4^-$  and their relative energies in kcal/mol. **12d**, **12e** and **12f** are transition states.

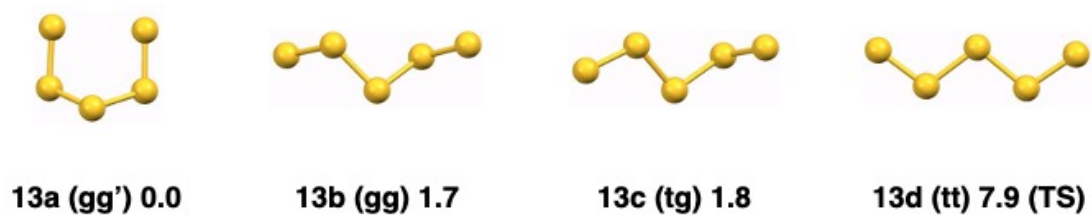

Figure 9S. Optimized geometries for isomers of  $S_5^-$  and their relative energies in kcal/mol. **13d** is a transition state.



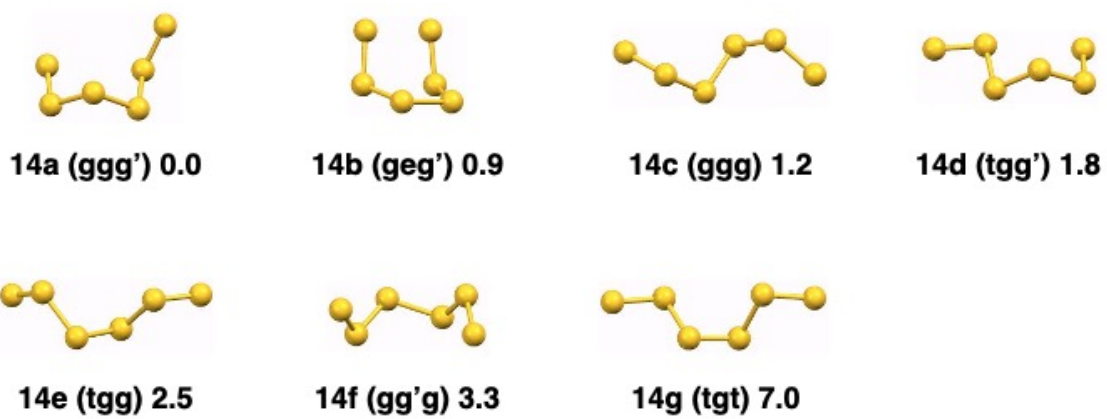

Figure 10S. Optimized geometries for isomers of  $S_6^-$  and their relative energies in kcal/mol.

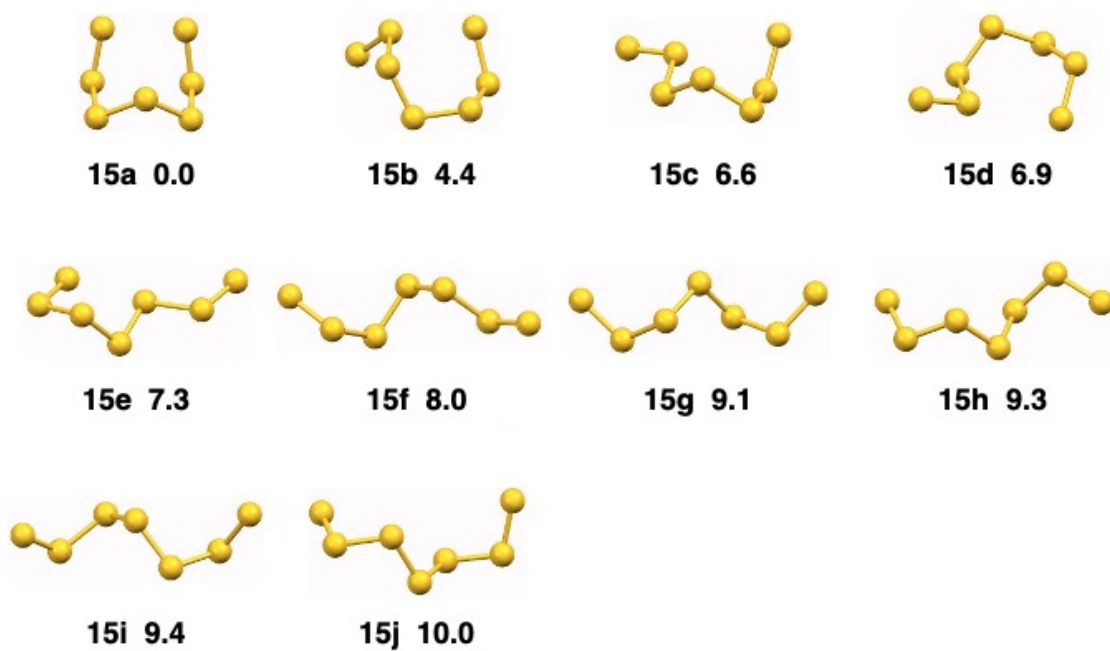

Figure 11S. Optimized geometries for isomers of  $S_7^-$  and their relative energies in kcal/mol.

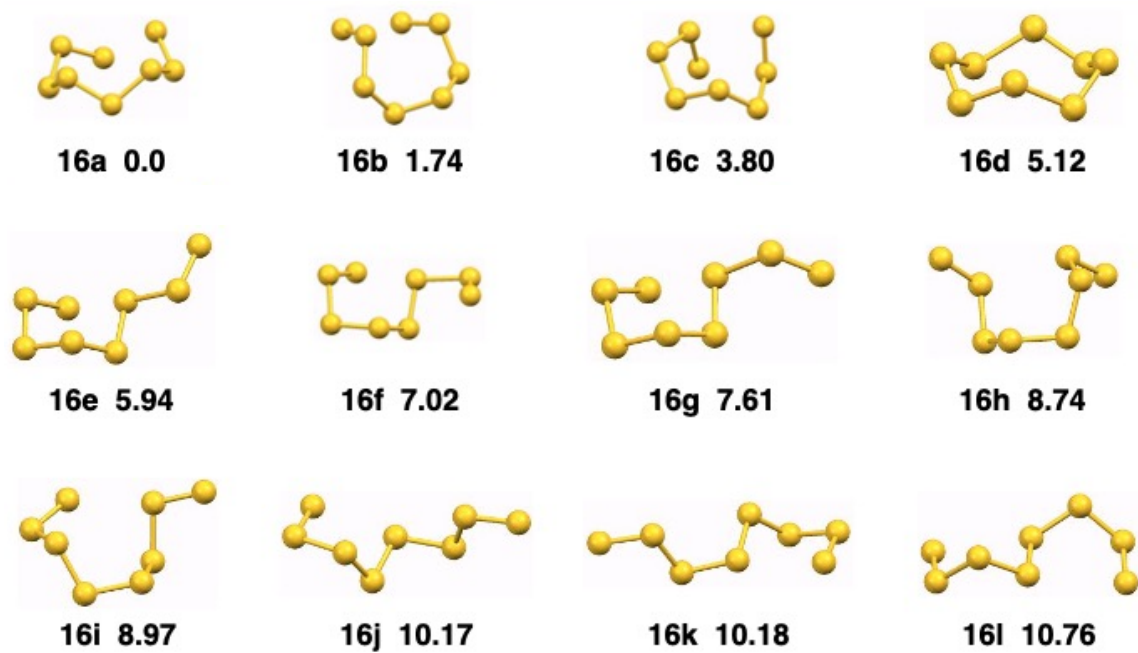

Figure 12S. Optimized geometries for isomers of  $S_8^-$  and their relative energies in kcal/mol.

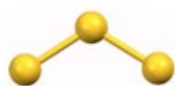

**19a 0.0**

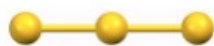

**19b 43.3 (TS)**

Figure 13S. Optimized geometries for isomers of  $S_3^{2-}$  and their relative energies in kcal/mol. **19b** is a transition state.

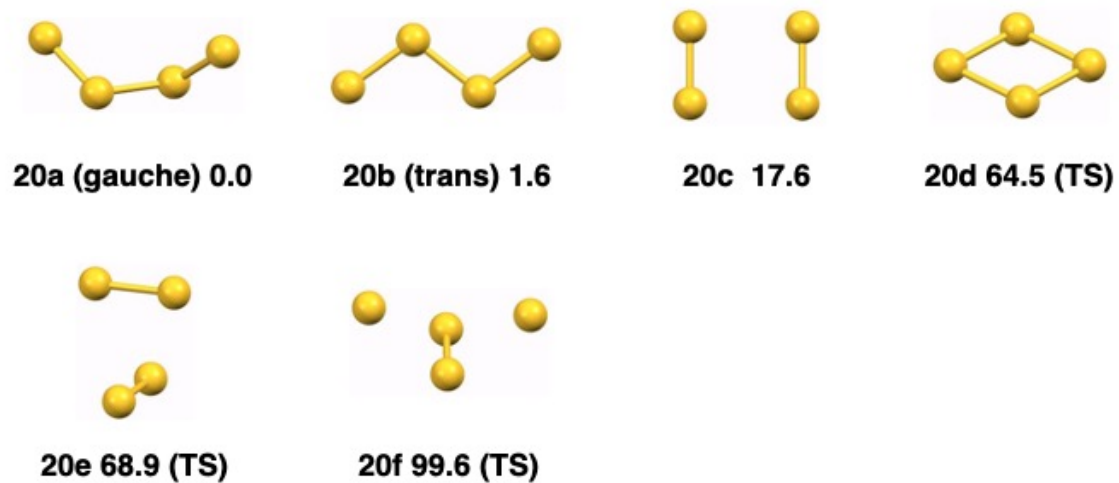

Figure 14S. Optimized geometries for isomers of  $S_4^{2-}$  and their relative energies in kcal/mol. **20d**, **20e** and **20f** are transition states.

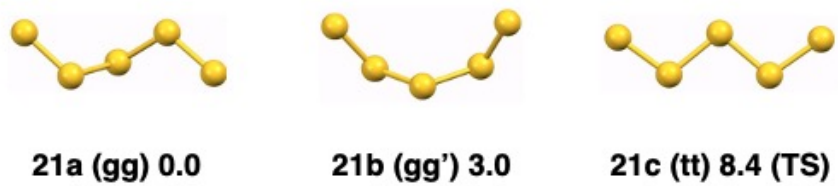

Figure 15S. Optimized geometries for isomers of  $S_3^{2-}$  and their relative energies in kcal/mol. **21c** is a transition state.

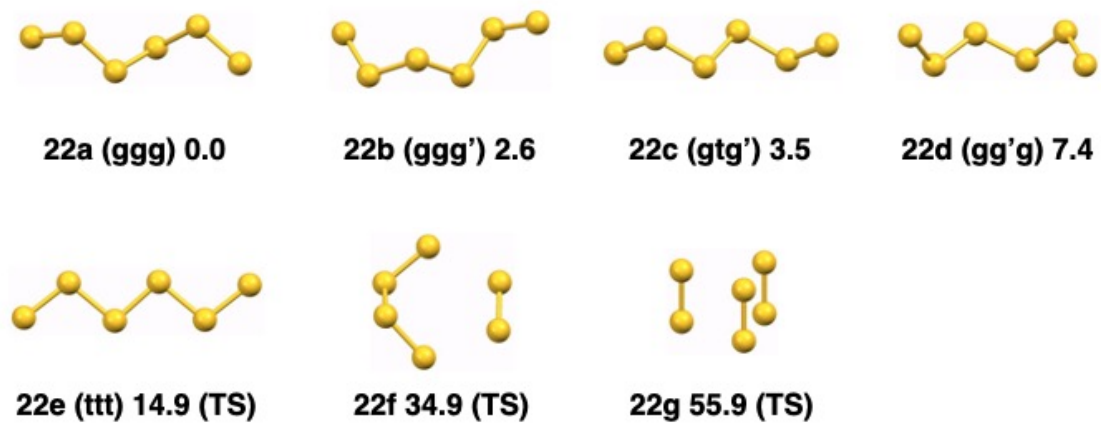

Figure 16S. Optimized geometries for isomers of  $S_6^{2-}$  and their relative energies in kcal/mol. **22e**, **22f** and **22g** are transition states.

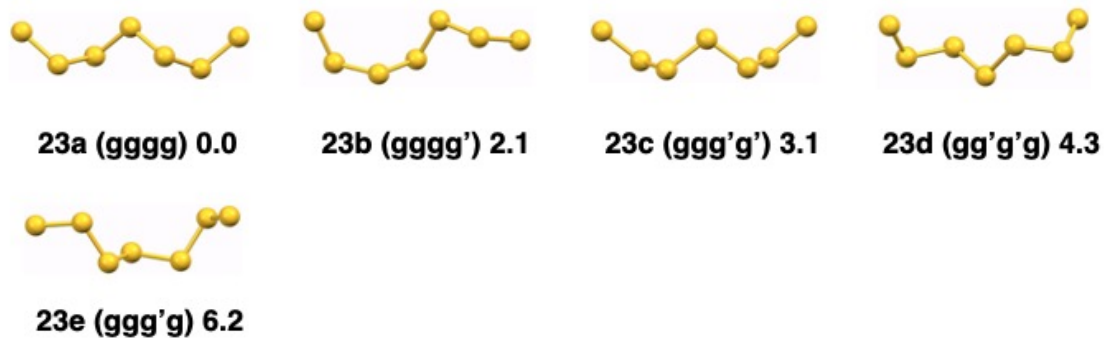

Figure 17S. Optimized geometries for isomers of S<sub>7</sub><sup>2-</sup> and their relative energies in kcal/mol.



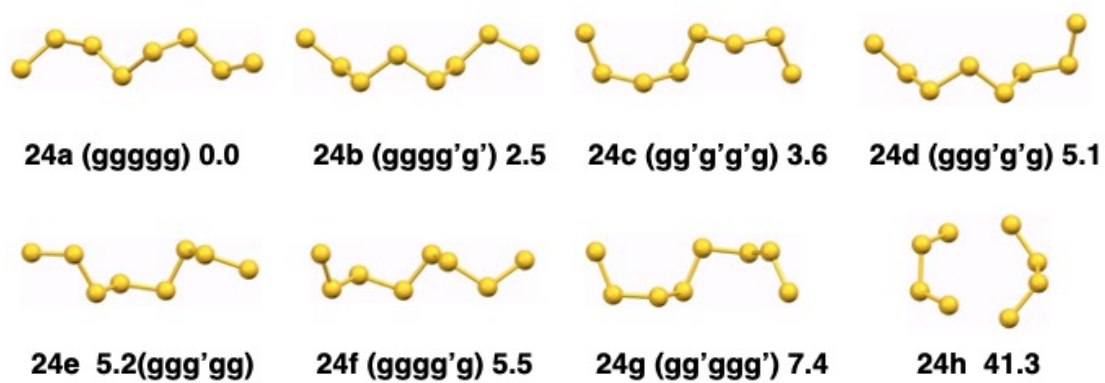

Figure 18S. Optimized geometries for isomers of  $S_8^{2-}$  and their relative energies in kcal/mol.

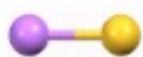

**25**

Figure 19S. Optimized geometry for [LiS]<sup>-</sup>.

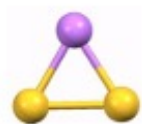

**26a 0.0**

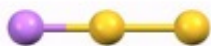

**26b 33.2**

Figure 20S. Optimized geometries for isomers of  $[\text{LiS}_2]^-$  and their relative energies in kcal/mol.

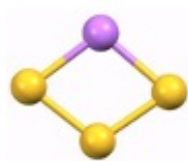

**27a 0.0**

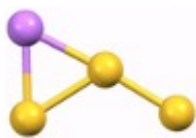

**27b (TS) 33.1**

Figure 21S. Optimized geometries for isomers of  $[\text{LiS}_3]^-$  and their relative energies in kcal/mol. **27b** is a transition state.

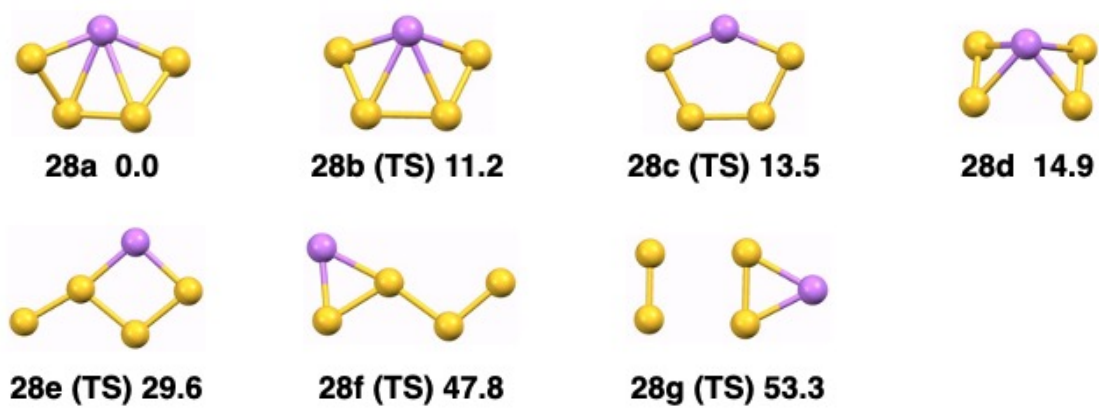

Figure 22S. Optimized geometries for isomers of  $[\text{LiS}_4]^-$  and their relative energies in kcal/mol. **28b**, **28c**, **28e**, **28f**, **28g** are transition states.

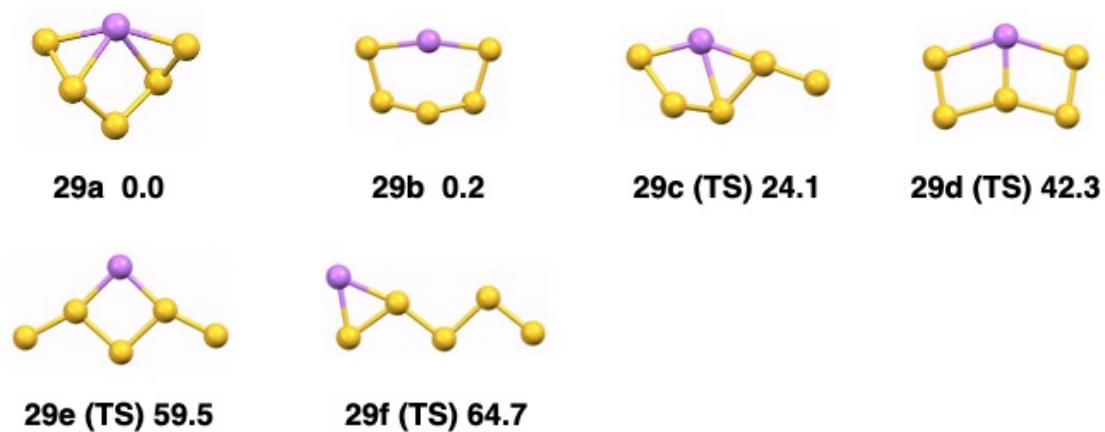

Figure 23S. Optimized geometries for isomers of  $[\text{LiS}_5]^-$  and their relative energies in kcal/mol. **29c**, **29d**, **29e**, **29f** are transition stat

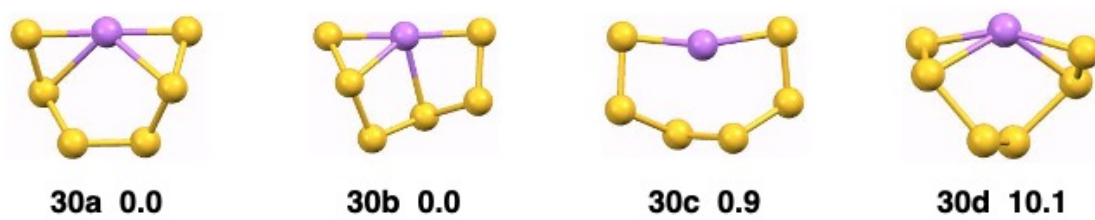

Figure 24S. Optimized geometries for isomers of [LiS<sub>6</sub>]<sup>-</sup> and their relative energies in kcal/mol.

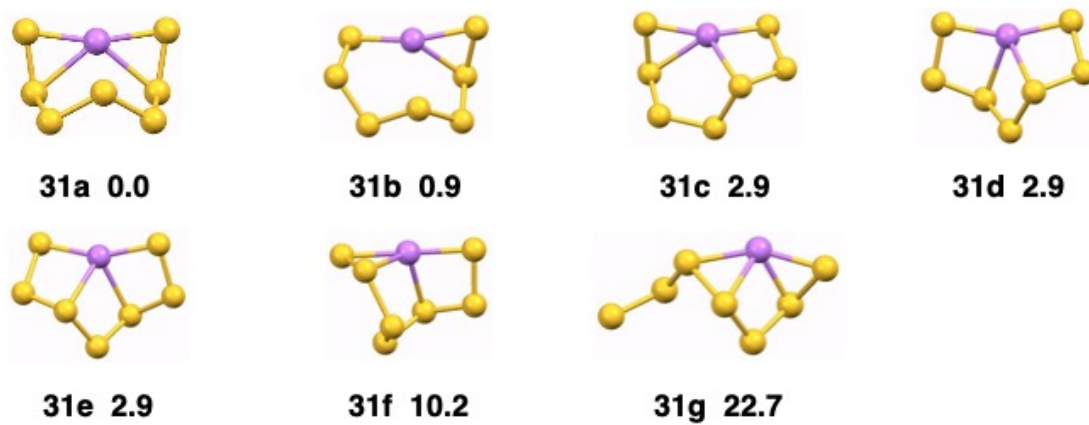

Figure 25S. Optimized geometries for isomers of  $[\text{LiS}_7]^-$  and their relative energies in kcal/mol.



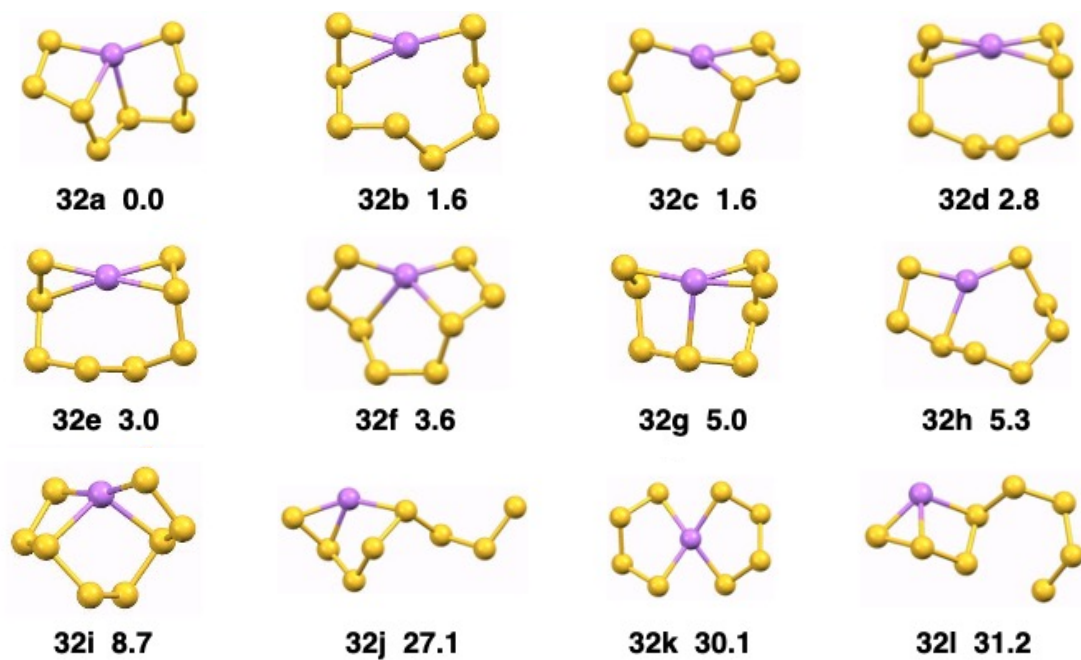

Figure 26S. Optimized geometries for isomers of  $[\text{LiS}_8]^-$  and their relative energies in kcal/mol.

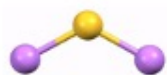

**33a** 0.0

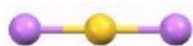

**33b (TS)** 0.1

Figure 27S. Optimized geometries for isomers of  $\text{Li}_2\text{S}$  and their relative energies in kcal/mol. **33b** is a transition state.

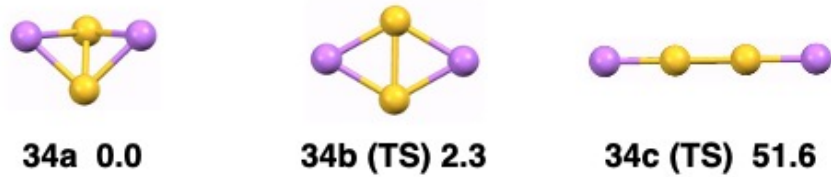

Figure 28S. Optimized geometries for isomers of  $\text{Li}_2\text{S}_2$  and their relative energies in kcal/mol. **34b** and **34c** are transition states.

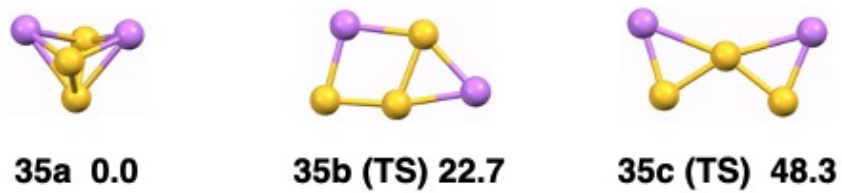

Figure 29S. Optimized geometries for isomers of  $\text{Li}_2\text{S}_3$  and their relative energies in kcal/mol. **35b** and **35c** are transition states.

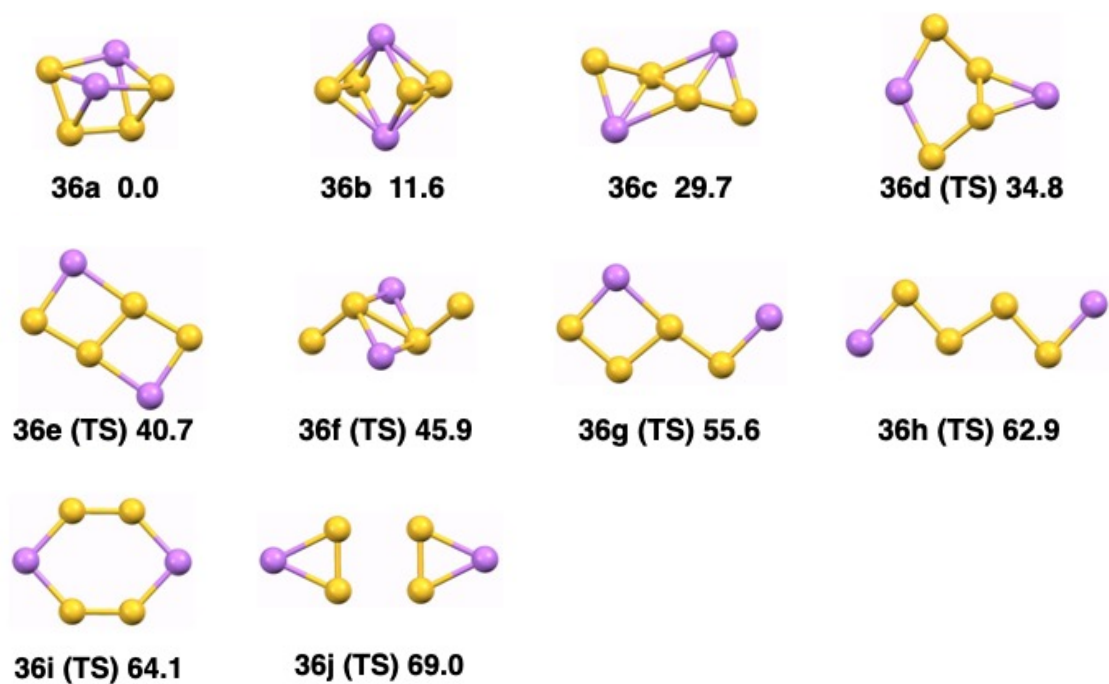

Figure 30S. Optimized geometries for isomers of  $\text{Li}_2\text{S}_4$  and their relative energies in kcal/mol. **36d**, **36e**, **36f**, **36g**, **36h**, **36i** and **36j** are transition states.

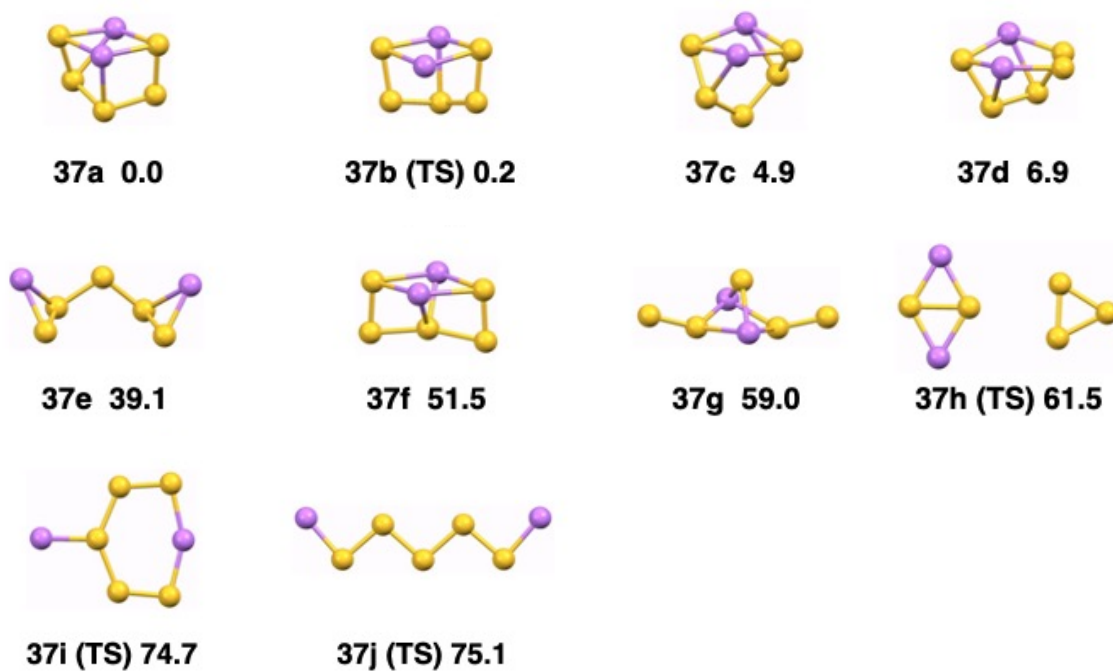

Figure 31S. Optimized geometries for isomers of  $\text{Li}_2\text{S}_5$  and their relative energies in kcal/mol. **37b**, **37h**, **37i** and **37j** are transition states.

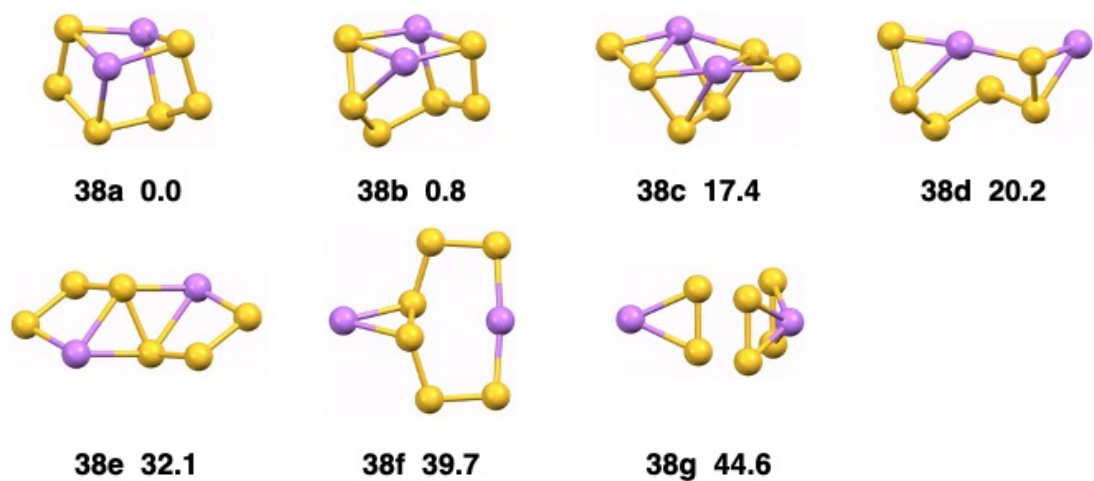

Figure 32S. Optimized geometries for isomers of  $\text{Li}_2\text{S}_6$  and their relative energies in kcal/mol.

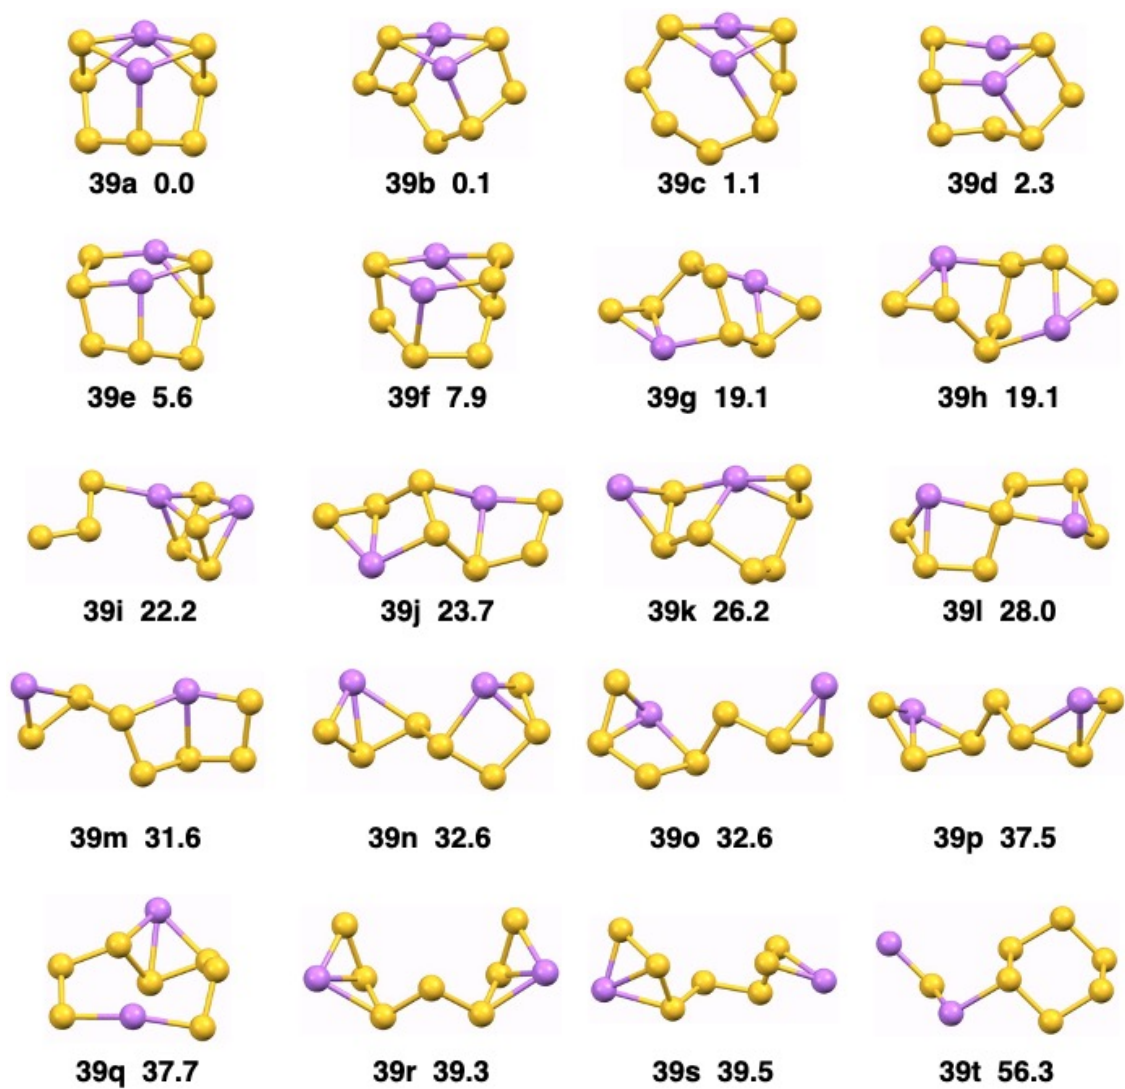

Figure 33S. Optimized geometries for isomers of  $\text{Li}_2\text{S}_7$  and their relative energies in kcal/mol.



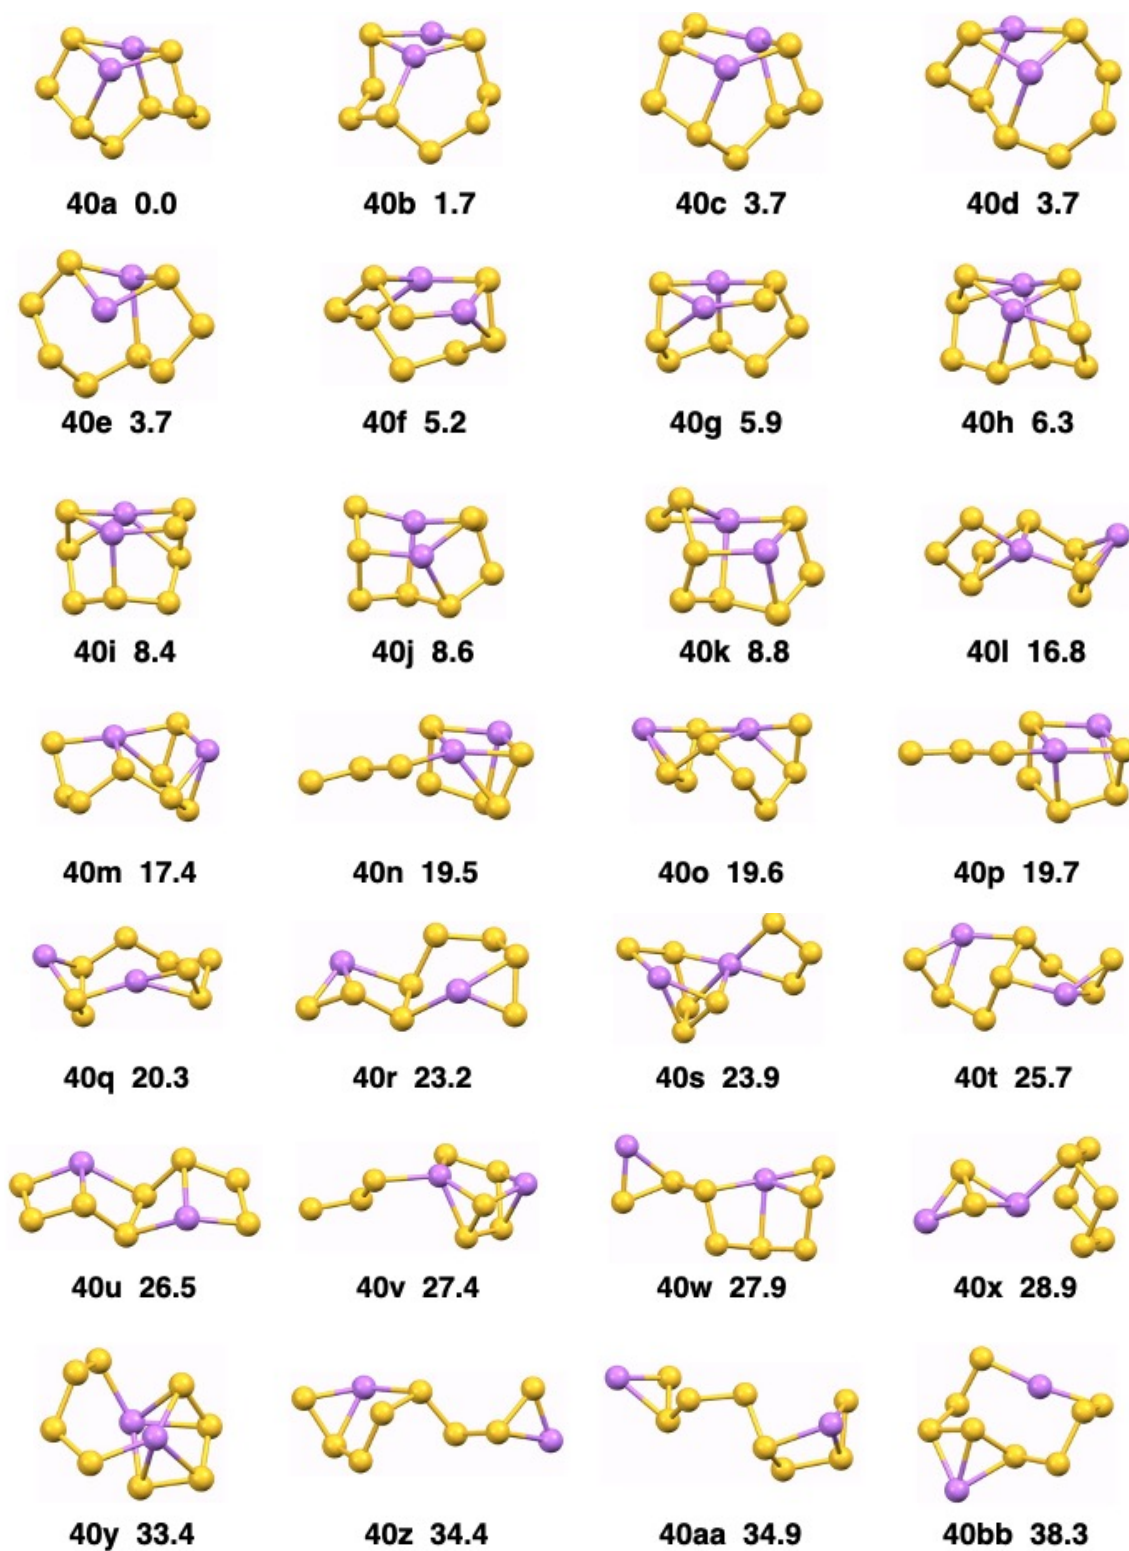

Figure 34S. Optimized geometries for isomers of  $\text{Li}_2\text{S}_8$  and their relative energies in kcal/mol.

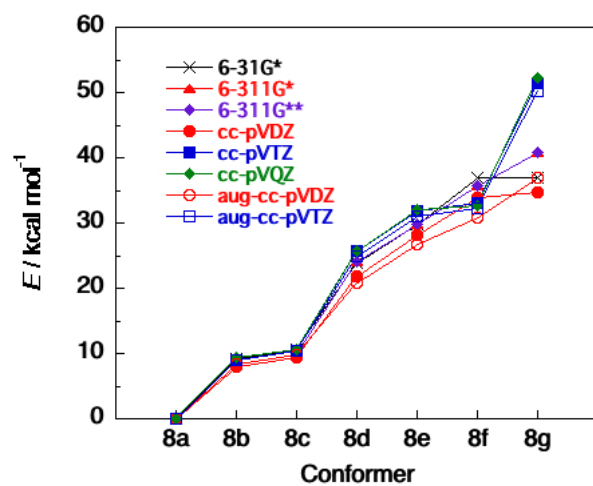

Figure 35S. Relative energies calculated for seven isomers of  $S_8$  (**8a-8g**) at the MP3 level using several basis sets. Geometries of isomers are shown in Figure 6S.

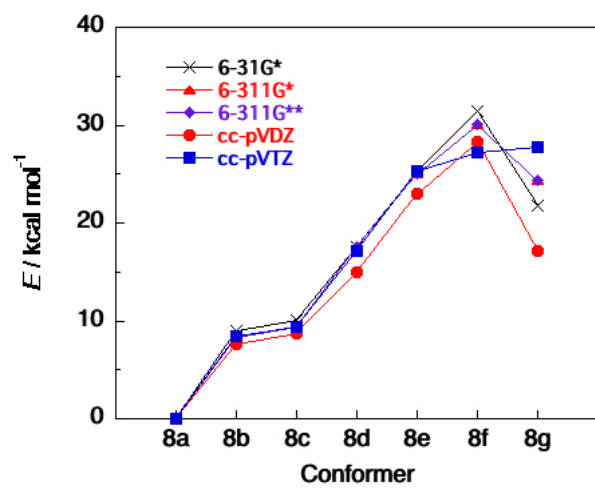

Figure 36S. Relative energies calculated for seven isomers of  $S_8$  (**8a-8g**) at the CCSD(T) level using several basis sets. Geometries of isomers are shown in Figure 6S.

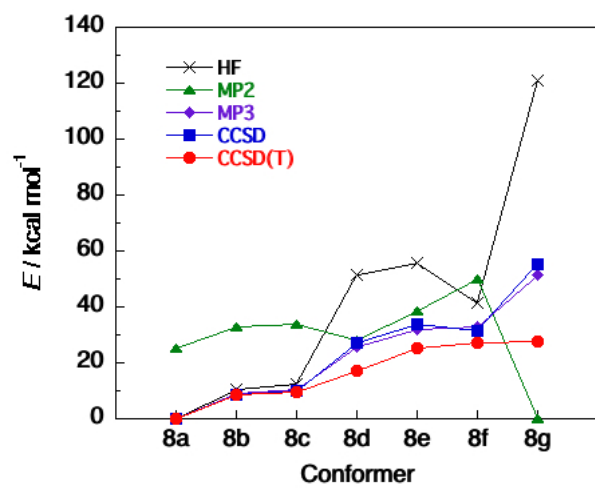

Figure 37S. Relative energies calculated for seven isomers of  $S_8$  (**8a-8g**) with several electron correlation correction methods using cc-pVTZ basis set. Geometries of isomers are shown in Figure 6S.

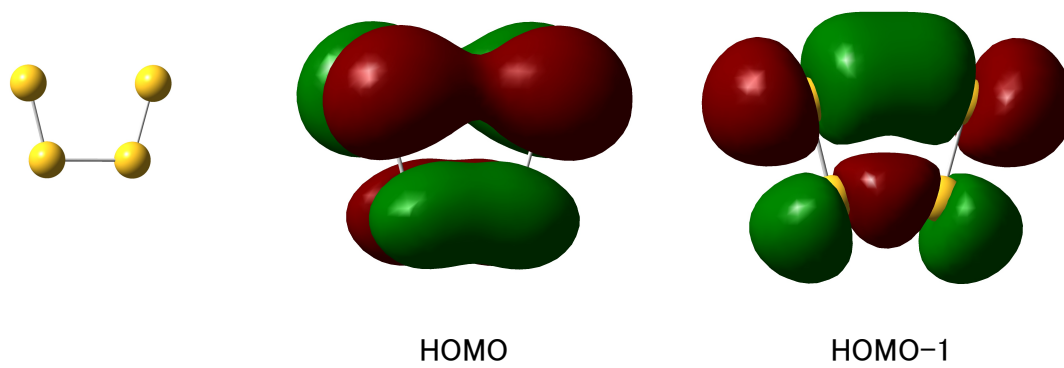

Figure 38S. Molecular orbitals calculated for  $S_4$  (**4a**).

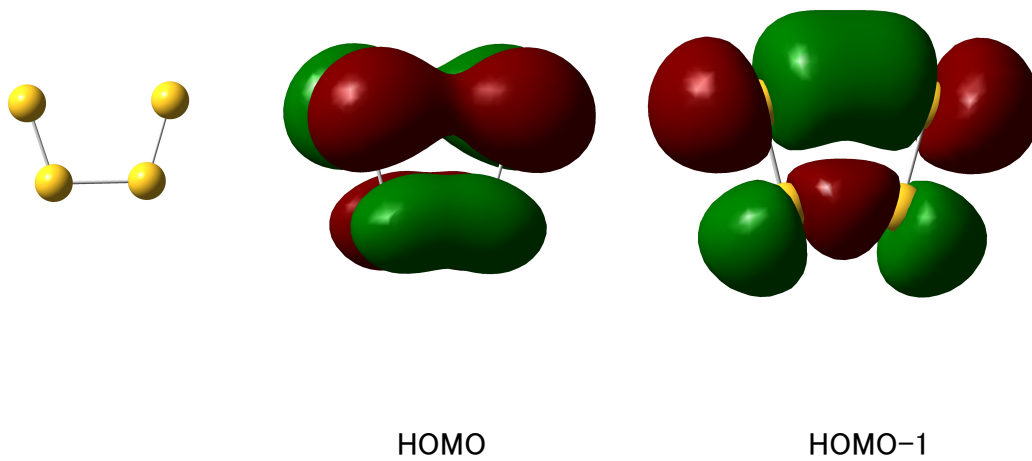

Figure 39S. Molecular orbitals calculated for  $S_4^{2-}$  (**12a**).

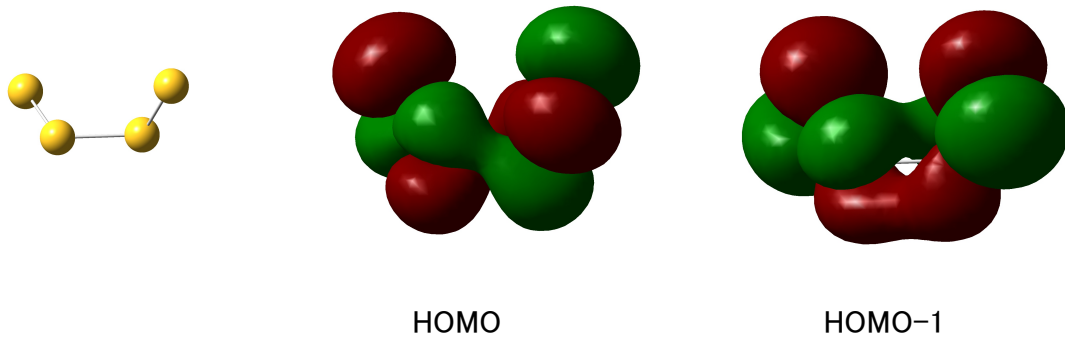

Figure 40S. Molecular orbitals calculated for  $S_4^{2-}$  (**20a**).
